# Supplementary material for: Glutamate-system defects behind psychiatric manifestations in a familial hemiplegic migraine type 2 disease-mutation mouse model
Source: PubMed Central journal article supplement (PMC4766516; doi:10.1038/srep22047), 2016-02-25
Supplement: srep22047-s1.pdf [file srep22047-s1.pdf]

# Glutamate-system defects behind psychiatric manifestations in a familial hemiplegic migraine type 2 disease-mutation mouse model

Pernille Böttger<sup>1,2,3</sup>, Simon Glerup<sup>1,4</sup>, Bodil Gesslein<sup>5</sup>, Nina B. Illarionova<sup>6</sup>, Toke J. Isaksen<sup>1,2</sup>, Anders Heuck<sup>1,2</sup>, Bettina H. Clausen<sup>3</sup>, Ernst-Martin Füchtbauer<sup>7</sup>, Jan B. Gramsbergen<sup>3</sup>, Eli Gunnarson<sup>6</sup>, Anita Aperia<sup>6</sup>, Martin Lauritzen<sup>5,8</sup>, Kate L. Lambertsen<sup>3</sup>, Poul Nissen<sup>2,7,9</sup>, Karin Lykke-Hartmann<sup>1,2,10\*</sup>

## **Affiliations:**

<sup>1</sup>Aarhus University, Department of Biomedicine, DK-8000 Aarhus, Denmark.

<sup>2</sup>Centre for Membrane Pumps in Cells and Disease-PUMPKIN, Danish National Research Foundation, Aarhus University, Department of Molecular Biology and Genetics, DK-8000 Aarhus C, Denmark.

<sup>3</sup>University of Southern Denmark, Institute of Molecular Medicine, Department of Neurobiology Research, DK-5000 Odense, Denmark.

<sup>4</sup>The Lundbeck Foundation Research Centre MIND, Aarhus University, Department of Biomedicine, DK-8000 Aarhus C, Denmark.

<sup>5</sup>University of Copenhagen, Department of Neuroscience and Pharmacology and Center for Healthy Aging, DK-2200 Copenhagen N, Denmark.

<sup>6</sup>Karolinska Institutet, Department of Women's and Children's Health, SE-171 76 Stockholm, Sweden.

<sup>7</sup>Aarhus University, Department of Molecular Biology and Genetics, DK-8000 Aarhus, Denmark.

<sup>8</sup>Glostrup Hospital, Department of Clinical Neurophysiology, DK-2600 Glostrup, Denmark.

<sup>9</sup>Danish Research Institute for Translational Neuroscience-DANDRITE, Nordic-EMBL Partnership of Molecular Medicine, Aarhus University, Department of Molecular Biology and Genetics and Department of Biomedicine, DK-8000 Aarhus C, Denmark.

<sup>10</sup>Aarhus Institute of Advanced Studies, Aarhus University, Høegh-Guldbergs Gade 6B DK-8000 Aarhus C, Denmark

\* Correspondence: Dr K Lykke-Hartmann, Aarhus Institute of Advanced Studies and Department of Biomedicine Aarhus University, Wilhelm Meyers Allé 4, DK-8000 Aarhus C, Denmark, Tel: +45-29390558, Fax: +45-86128804, E-mail: [kly@biomed.au.dk](mailto:kly@biomed.au.dk).

**Supplementary Table 1. Generation and basic characterization of the *Atp1a2* G301R knock-in mouse**

| Fig. S1a                                                               |                                                                                                                                                                                                                                                                                                                                                                                                                                                                            |                                                                                                                                                                                                                                                                                                                                                                                                                                                                                                                                        |
|------------------------------------------------------------------------|----------------------------------------------------------------------------------------------------------------------------------------------------------------------------------------------------------------------------------------------------------------------------------------------------------------------------------------------------------------------------------------------------------------------------------------------------------------------------|----------------------------------------------------------------------------------------------------------------------------------------------------------------------------------------------------------------------------------------------------------------------------------------------------------------------------------------------------------------------------------------------------------------------------------------------------------------------------------------------------------------------------------------|
| Aim                                                                    | Cloning information                                                                                                                                                                                                                                                                                                                                                                                                                                                        | Procedure information                                                                                                                                                                                                                                                                                                                                                                                                                                                                                                                  |
| Vector background                                                      | StrataClone™pSC-B 3.5kb (Stratagene Corp) using Stratagene Blunt CPR (#200184)                                                                                                                                                                                                                                                                                                                                                                                             |                                                                                                                                                                                                                                                                                                                                                                                                                                                                                                                                        |
| pSC-B-N (intron 6 to intron 8)                                         | P1: 5'-CGG ATC GAT GCA GCC CAG AGA TGA AAG AC -3'<br>P2: 5'-CGG GCG GCC GCT GAC ACA TCA CAG TGG CTG A -3'<br><br>3.38 kb fragment from 129Svj DNA                                                                                                                                                                                                                                                                                                                          | PfuUltra fusion HS DNA polymerase (Stratagene Corp, #600670-12)                                                                                                                                                                                                                                                                                                                                                                                                                                                                        |
| pSC-B-C (intron 7 to intron 13)                                        | P3: 5'-CCA ACT GTT AGG AGT ATG GAA GTC AAG TGA G -3'<br>P4: 5'-GCT CTA ATA AAC CTT TAG TTT ATA CTC ATG TGC TAA TG -3'<br><br>6.68 kb fragment from 129Svj DNA                                                                                                                                                                                                                                                                                                              |                                                                                                                                                                                                                                                                                                                                                                                                                                                                                                                                        |
| pSC-B-N LoxP-Neo-LoxP (AflII)                                          | LoxP-Neo-LoxP (1.5kb) <i>Cla</i> I-digested from pLoxP-PGK-Neo vector (4.512kb)                                                                                                                                                                                                                                                                                                                                                                                            | Cloned blunt in into the <i>Afl</i> II-digested pSC-B-N vector (intron 7)                                                                                                                                                                                                                                                                                                                                                                                                                                                              |
| pSC-B-N-loxP-Neo-LoxP (AflII)-LoxP (BstEII)                            | pSC-B-N PCR fragment (564bp):<br>P5: 5'-ATT AAC CCT CAC TAA AGG GA -3'<br>P6: 5'-CAT CTC TAG AAT TGT TGG CCA CCG TGA CTG T -3'<br>P7: 5'-GTC ACA TAA CTT CGT ATA ATG TAT GCT ATA CGA AGT TAT -3'<br>P8: 5'-GTG ACA TAA CTT CGT ATA GCA TAC ATT ATA CGA AGT TAT -3'                                                                                                                                                                                                         | The 564bp PCR fragment was subcloned. Annealed LoxP oligos (P7 and P8) cloned into this, using <i>Bst</i> EII restriction sites. This partial pSC-B-partial-N-LoxP ( <i>Bst</i> EII) was digested with <i>Hind</i> III and <i>Msc</i> I (518bp) and the 518 bp fragment was cloned into the <i>Hind</i> III- and <i>Msc</i> I-digested pSC-B-N LoxP-Neo-LoxP ( <i>Afl</i> II), generating pSC-B-N-LoxP-Neo-LoxP ( <i>Afl</i> II)-LoxP( <i>Bst</i> EII).<br><i>Hind</i> III(R0104S) and <i>Stu</i> I (R0187S) from New England Biolabs. |
| Mutagenesis of G <sub>301</sub> A encoding the G301R mutation (exon 8) | PCR-1 generates fragment of 623 bp<br>P9: 5'-CGA TAA GCT TGA TAT CCA CTG TGG AA -3' ( <i>Hind</i> III)<br>P10: 5'-CTG TGT TCC TGA GGG TCT CCT TCT -3'<br><br>PCR-2 generates fragment of 1 097 bp<br>P11: 5'-AGA AGG AGA CCC TCA GGA ACA CAG -3'<br>P12: 5'-CCA GGC CTA CCC GCT TCC ATT GCT C -3' ( <i>Stu</i> I)<br><br>PCR-3: template is fragments from PCR's 1 and 2<br>P9: 5'-CGA TAA GCT TGA TAT CCA CTG TGG AA -3'<br>P12: 5'-CCA GGC CTA CCC GCT TCC ATT GCT C -3' | Pfu DNA polymerase (EP0572, Fermentas™) generated PCR 3, was <i>Hind</i> III and <i>Stu</i> I-digested and the 622 bp product was subcloned into the <i>Hind</i> III and <i>Stu</i> I-digested pSC-B-N-LoxP-Neo-LoxP( <i>Afl</i> II)-LoxP( <i>Bst</i> EII)-"G→A" vector.                                                                                                                                                                                                                                                               |
| Combination of "N" and "C"                                             | Removal of pSC-B vector sequence flanking <i>Hind</i> III-site in pSC-B-N-LoxP-Neo-LoxP( <i>Afl</i> II)-LoxP( <i>Bst</i> EII)-"G→A".<br>P13: 5'-GCA AGC TTA GCT GAG AAA TGT CAA TGG ATT TG -3' ( <i>Hind</i> III) P14: 5'-CGG TGG ATG TGG AAT GTG TG -3'<br>PCR generates fragment of 1 406 bp which was <i>Hind</i> III and <i>Bst</i> EII digested and a fragment of 622 bp was purified                                                                                 | <i>Hind</i> III and <i>Bst</i> EII-digested pSC-B-N-LoxP-Neo-LoxP( <i>Afl</i> II)-LoxP( <i>Bst</i> EII)-"G→A" was SAP-treated and fragment purified after agarose gel separation. The 622 bp fragment was sticky-end ligated into pSC-B-N-LoxP-Neo-LoxP( <i>Afl</i> II)-LoxP( <i>Bst</i> EII)-"G→A" (SAP, <i>Hind</i> III and ligase informations above). This generates pSC-B-N-LoxP-Neo-LoxP( <i>Afl</i> II)-LoxP( <i>Bst</i> EII)-"G→A"-trim"                                                                                       |
|                                                                        | PCR generates a 4.39 kb fragment of pSC-B-"C"<br>P15: 5'-CTC ATC CTT AAT GCT GCT GC -3'<br>P16: 5'-TGC TCT AAT AAA CCT TTA GTT TA -3'                                                                                                                                                                                                                                                                                                                                      | <i>Hind</i> III-digestion of pSC-B-N-LoxP-Neo-LoxP( <i>Afl</i> II)-LoxP( <i>Bst</i> EII)-"G→A"-trim" generated a 4.39 kb fragment -> blunt-end ligated into pSC-B-N-LoxP-Neo-LoxP( <i>Afl</i> II)-LoxP( <i>Bst</i> EII)-"G→A"-trim". This generates pSC-B-N-LoxP-Neo-LoxP( <i>Afl</i> II)-LoxP( <i>Bst</i> EII)-"G→A"-trim"-C"                                                                                                                                                                                                         |
| 2×TK                                                                   | 2×TK amplified from plasmid (pBSSK-TK2-14) by PCR generating <i>Sac</i> II sites. P17: 5'-CGC ACC GCG GGT AAT ACG ACT CAC TAT AGG -3' ( <i>Sac</i> II)<br>P18: 5'-GCG TGG CGC CAA TTA ACC CTC ACT AAA GGG AA -3' ( <i>Sac</i> II)<br><br>PCR product of 3652 bp is digested with <i>Sac</i> II and purified                                                                                                                                                                | Plasmid pBSSK-TK2-14 from DAGMAR Facility, AU.<br><i>Sac</i> II-digested pSC-B-N-LoxP-Neo-LoxP( <i>Afl</i> II)-LoxP( <i>Bst</i> EII)-"G→A"-trim"-C" was purified. The 2×TK fragment was ligated into pSC-B-N-LoxP-Neo-LoxP( <i>Afl</i> II)-LoxP( <i>Bst</i> EII)-"G→A"-trim"-C". This generates the final targeting vector of 16.69 kb.                                                                                                                                                                                                |

| Fig. S1b |                          |                                                                                                |          |                               |                    |                    |                                                                |                     |       |
|----------|--------------------------|------------------------------------------------------------------------------------------------|----------|-------------------------------|--------------------|--------------------|----------------------------------------------------------------|---------------------|-------|
| Test     | Aim                      | Primers                                                                                        | Genotype | Target                        | Genomic DNA source | PCR: (lengths, bp) | Information                                                    |                     |       |
| PCR      | Homologous recombination | P19: 5'-ATC AGC GAG CTC AGG ACA TT -3'<br>P20: 5'-CAG GAC GTG ACA AAT GGA AG -3'               | WT (+/+) | 5' end: Exon 4 to intron 7    | C1: 129/Svj        | 0                  | Template: 200 ng<br>DMSO: 1%<br>Long PCR enzyme mix            |                     |       |
|          |                          | P19 locates to exon 4 outside targeting construct<br>P20 locates to intron 7 (NEO-specific)    | WT (+/+) |                               |                    |                    |                                                                | C2: MDX/BL6         | 0     |
|          |                          |                                                                                                | KI (+/-) |                               |                    |                    |                                                                | IIIH6 ES cell clone | 4 679 |
|          |                          | P21: 5'-TGC TAT TGT CTT CCC AAT CCT -3'<br>P22: 5'-GTG GCA GAA TGG AGC AAG TC -3'              | WT (+/+) | 3' end: Intron 7 to intron 13 | C1: 129/Svj        | 0                  | Template: 50 ng<br>DMSO: 4%<br>Long PCR enzyme mix             |                     |       |
|          |                          | P21 locates to intron 7 (NEO-specific)<br>P22 locates to intron 13 outside targeting construct | WT (+/+) |                               |                    |                    |                                                                | C2: MDX/BL6         | 0     |
|          |                          |                                                                                                | KI (+/-) |                               |                    |                    |                                                                | IIIH6 ES cell clone | 7 595 |
|          |                          | P20: 5'-CAG GAC GTG ACA AAT GGA AG -3'<br>P21: 5'-TGC TAT TGT CTT CCC AAT CCT -3'              | WT (+/+) | NEO: Intron 7                 | C1: 129/Svj        | 0                  | Template: 200 ng<br>Long PCR enzyme mix<br>(K0182, Fermentas™) |                     |       |
|          |                          | P20 locates to intron 7 (NEO-specific)<br>P21 locates to intron 7 (NEO-specific)               | WT (+/+) |                               |                    |                    |                                                                | C2: MDX/BL6         | 0     |
|          |                          |                                                                                                | KI (+/-) |                               |                    |                    |                                                                | IIIH6 ES cell clone | 1 329 |

**Supplementary Table 1. Generation and basic characterization of the *Atp1a2* G301R knock-in mouse – *continued***

| Test          | Aim                               | Primers (and probe-related information)                                                                                                                  | Genotype | Genomic DNA source | Reagents                                                                              | Genomic DNA: <i>KpnI</i> and <i>SpeI</i> digest (probed lengths, bp) | Information                                                                    | Figure |
|---------------|-----------------------------------|----------------------------------------------------------------------------------------------------------------------------------------------------------|----------|--------------------|---------------------------------------------------------------------------------------|----------------------------------------------------------------------|--------------------------------------------------------------------------------|--------|
| Southern blot | Homologous recombination (5' end) | Probe length: 500 bp (template: plasmid with 129/SvJ genomic DNA)<br>P19: 5'- ATC AGC GAG CTC AGG ACA TT - 3'<br>P23: 5'- CAG TCT CCT AAC CAC GCT CC -3' | WT (+/+) | ES cells           | <i>KpnI</i> enzyme (R0142S)<br><i>SpeI</i> enzyme (R0133S)<br>New England Biolabs Ltd | 9 692                                                                | Double-digest of approx. 5-10 µg genomic DNA using <i>KpnI</i> and <i>SpeI</i> | S1c    |
|               |                                   |                                                                                                                                                          | KI (+/-) | IIH6 ES cells      |                                                                                       | 9 692; 11 340                                                        |                                                                                |        |

| Test | Aim                          | Primers (and PCR-related information)                                                                                                                                                                                                            | Genotype | Genomic DNA source      | PCR: (length, bp) <i>BstEII</i> -digest           | Information                                                                              | PCR: (length, bp) <i>BstEII</i> and <i>BglII</i> -digest | Figure |
|------|------------------------------|--------------------------------------------------------------------------------------------------------------------------------------------------------------------------------------------------------------------------------------------------|----------|-------------------------|---------------------------------------------------|------------------------------------------------------------------------------------------|----------------------------------------------------------|--------|
| PCR  | Partial Cre-enzyme treatment | P3: 5'- CCA ACT GTT AGG AGT ATG GAA GTC AAG TGA - 3'<br>P24: 5'- GAG GGA TAC AGT ATG GGA AC -3'<br>P3 locates to intron 7<br>P24 locates to intron 11<br>Template: 50 ng<br>Long PCR enzyme mix (K0182, Fermentas™) Thermo Fisher Scientific Inc | KI (+/-) | IIH6Cre14 (Partial Cre) | 1 632/1 610/1 599;<br>1 031; 546/506<br>~ 3 bands | <i>BstEII</i> enzyme (R0162S)<br><i>BglII</i> enzyme (R0144S)<br>New England Biolabs Ltd | 1 610; 1 032; 935; 902;<br>697; 546/506<br>~ 6 bands     | S1d    |
|      |                              |                                                                                                                                                                                                                                                  | KI (+/-) | C3 (Full Cre)           | 2 021; 1 599;<br>1 031; 506/546<br>~ 4 bands      |                                                                                          | 1 324; 1 031; 902;<br>697; 546/506<br>~ 5 bands          |        |
|      |                              |                                                                                                                                                                                                                                                  | WT       | C4: 129/SvJ (WT)        | 1 599; 1 031; 546/506<br>~ 3 bands                |                                                                                          | 1 031; 902;<br>697; 546/506<br>~ 4 bands                 |        |

| Test | Aim        | Primers                                                                                                                                                       | Genotype | PCR: (length, bp) | Reagents                                                                  | PCR: <i>BstEII</i> -digest (length, bp) | Information                                                                     | Figure |
|------|------------|---------------------------------------------------------------------------------------------------------------------------------------------------------------|----------|-------------------|---------------------------------------------------------------------------|-----------------------------------------|---------------------------------------------------------------------------------|--------|
| PCR  | Genotyping | P6: 5'- CAT CTC TAG AAT TGT TGG CCA CCG TGA CTG T -3'<br>P24: 5'- GAG GGA TAC AGT ATG GGA AC -3'<br>P6 locates to exon 8/intron 8<br>P24 locates to intron 11 | WT (+/+) | 1 876             | DreamTaq DNA polymerase (EP0702, Fermentas™) Thermo Fisher Scientific Inc | 1 031; 516; 329                         | Abolishment of <i>BstEII</i> -site due to 3' LoxP (33 bp) insertion in intron 8 | S1e    |
|      |            |                                                                                                                                                               | KI (+/-) | 1 876/1 909       |                                                                           | 1 393; 1 031;<br>516; 329               |                                                                                 |        |
|      |            |                                                                                                                                                               | KI (-/-) | 1 909             |                                                                           | 1 393; 516                              |                                                                                 |        |

| Test       | Aim                        | Primer                                                            | Genotype | Amount of genomic DNA (ng/µL) | Information                                        | Figure |
|------------|----------------------------|-------------------------------------------------------------------|----------|-------------------------------|----------------------------------------------------|--------|
| Sequencing | Detection of G->A mutation | P25: 5'- CAG TCA TTG GCA AAC CCA G -3'<br>P25 locates to intron 7 | KI (+/-) | 10 ng/µL (15 µL)              | Sequencing (Eurofins MWG Operon facility, Germany) | S1f    |
|            |                            |                                                                   | WT (+/+) | 10 ng/µL (15 µL)              |                                                    |        |

| Test        | Sex (F/M) | Measurement     | Genotype/Animals (n) | Mean and s.e.m. | Statistical test | P-value                    | Figure |
|-------------|-----------|-----------------|----------------------|-----------------|------------------|----------------------------|--------|
| Body weight | F         | Body weight (g) | WT = 7               | Not shown       | Two-way ANOVA    | Genotype: <i>P</i> = 0.928 | S1g    |
|             |           |                 | KI = 11              | Not shown       |                  |                            |        |
|             | M         |                 | WT = 7               | Not shown       | Two-way ANOVA    | Genotype: <i>P</i> = 0.004 |        |
|             |           |                 | KI = 6               | Not shown       |                  |                            |        |

Supplementary Table 2. Western blotting

| Test                  | Age (days)        | Sex (F/M)           | Genotype          | Load ( $\mu$ g pr lane) | $\alpha_2$ -protein amount (Arbitrary Units, AU) | GAPDH-protein amount (Arbitrary Units, AU) | Reagents (or indicated information)                                                      | Relative $\alpha_2$ -level quantification (%) | Information                                                          | Figure |                |             |           |     |
|-----------------------|-------------------|---------------------|-------------------|-------------------------|--------------------------------------------------|--------------------------------------------|------------------------------------------------------------------------------------------|-----------------------------------------------|----------------------------------------------------------------------|--------|----------------|-------------|-----------|-----|
| SDS-page Western blot | E17.5             | -                   | WT (+/+)          | 30                      | 3 355 752                                        | 2 732 798                                  | Rabbit anti human $\alpha_2$ aa 432-455 (07674, Upstate) Millipore Corp 1:5 000 dilution | 100                                           | $\alpha_2$ -isoform:~ 110 kDa                                        | S2a    |                |             |           |     |
|                       |                   |                     | KI (+/-)          | 30                      | 2 299 512                                        | 2 422 280                                  |                                                                                          | 77                                            |                                                                      |        |                |             |           |     |
|                       |                   |                     | KI (-/-)          | 30                      | 962 072                                          | 2 724 203                                  |                                                                                          | 29                                            |                                                                      |        |                |             |           |     |
|                       | New born (0 days) | -                   | WT (+/+)          | 30                      | 11 839 549                                       | 67 277 802                                 | Rabbit anti human GAPDH aa 1-335 (sc-25778) Santa Cruz Biotechnology                     | 100                                           | GAPDH:~ 35 kDa                                                       |        |                |             |           |     |
|                       |                   |                     | KI (+/-)          | 30                      | 6 119 085                                        | 59 089 772                                 |                                                                                          | 59                                            |                                                                      |        |                |             |           |     |
|                       |                   |                     | KI (-/-)          | 30                      | 431 997                                          | 56 240 436                                 |                                                                                          | 4                                             |                                                                      |        |                |             |           |     |
|                       | 200               | M                   | WT (+/+)          | 25                      | 192 587                                          | 9 643 299                                  | Hippocampus, HC                                                                          | 100                                           | Brain areas were dissected from two mice of each genotype and pooled |        |                |             |           |     |
|                       |                   |                     | KI (+/-)          | 25                      | 123 548                                          | 9 724 048                                  |                                                                                          | 64                                            |                                                                      |        |                |             |           |     |
|                       |                   |                     | WT (+/+)          | 25                      | 257 109                                          | 8 228 897                                  | Cerebellum, CRBL                                                                         | 100                                           |                                                                      |        |                |             |           |     |
|                       |                   |                     | KI (+/-)          | 25                      | 118 848                                          | 9 506 595                                  |                                                                                          | 40                                            |                                                                      |        |                |             |           |     |
|                       |                   |                     | WT (+/+)          | 25                      | 155 539                                          | 9 766 206                                  | Cortex, CTX                                                                              | 100                                           |                                                                      |        |                |             |           |     |
|                       |                   |                     | KI (+/-)          | 25                      | 107 716                                          | 11 050 225                                 |                                                                                          | 61                                            |                                                                      |        |                |             |           |     |
|                       |                   |                     | WT (+/+)          | 25                      | 260 909                                          | 6 267 243                                  |                                                                                          | Brain stem, BS                                |                                                                      |        | 100            |             |           |     |
| KI (+/-)              | 25                | 90 246              | 9 842 882         | 22                      |                                                  |                                            |                                                                                          |                                               |                                                                      |        |                |             |           |     |
| Adult                 | M+F               | C5: WT brain lysate | 25                | -                       | -                                                | Whole brain                                | -                                                                                        | Pool of two mice brains                       |                                                                      |        |                |             |           |     |
| SDS-page Western blot | E17.5             | -                   | WT (+/+) = 1      | 30                      | 3 355 752 (AU)                                   | 2 732 798 (AU)                             | Rabbit anti human $\alpha_2$ aa 432-455 (07674, Upstate) Millipore Corp 1:5 000 dilution | 100                                           | $\alpha_2$ -isoform:~ 110 kDa                                        | S2a    |                |             |           |     |
|                       |                   |                     | KI (+/-) = 1      | 30                      | 2 299 512 (AU)                                   | 2 422 280 (AU)                             |                                                                                          | 77                                            |                                                                      |        |                |             |           |     |
|                       |                   |                     | KI (-/-) = 1      | 30                      | 962 072 (AU)                                     | 2 724 203 (AU)                             |                                                                                          | 29                                            |                                                                      |        |                |             |           |     |
|                       |                   | -                   | WT (+/+) = 1      | 30                      | 127 484 (QL)                                     | 15 267 001 (QL)                            | Rabbit anti human GAPDH aa 1-335 (sc-25778) Santa Cruz Biotechnology Inc 1:200 dilution  | 91                                            |                                                                      |        | GAPDH:~ 35 kDa |             |           |     |
|                       |                   |                     | WT (+/+) = 1      | 30                      | 117 625 (QL)                                     | 11 813 043 (QL)                            |                                                                                          | 109                                           |                                                                      |        |                |             |           |     |
|                       |                   |                     | KI (+/-) = 1      | 30                      | 108 806 (QL)                                     | 19 488 227 (QL)                            |                                                                                          | 56                                            |                                                                      |        |                |             |           |     |
|                       |                   |                     | KI (+/-) = 1      | 30                      | 54 176 (QL)                                      | 16 568 309 (QL)                            |                                                                                          | 33                                            |                                                                      |        |                |             |           |     |
|                       |                   |                     | KI (-/-) = 1      | 30                      | 44 384 (QL)                                      | 25 354 080 (QL)                            |                                                                                          | 18                                            |                                                                      |        |                |             |           |     |
|                       |                   |                     | KI (-/-) = 1      | 30                      | 26 650 (QL)                                      | 20 449 931 (QL)                            |                                                                                          | 13                                            |                                                                      |        |                |             |           |     |
|                       | E17.5             | -                   | WT (+/+) = 3      | See above               | See above                                        | See above                                  | See above                                                                                | 100 $\pm$ 5                                   | See above                                                            | S2c    |                |             |           |     |
|                       |                   |                     | KI (+/-) = 3      |                         |                                                  |                                            |                                                                                          | 55 $\pm$ 13                                   |                                                                      |        |                |             |           |     |
|                       |                   |                     | KI (-/-) = 3      |                         |                                                  |                                            |                                                                                          | 20 $\pm$ 5                                    |                                                                      |        |                |             |           |     |
|                       | New born (0 days) | -                   | WT (+/+) = 1      | 30                      | 11 839 549 (AU)                                  | 67 277 802 (AU)                            | Rabbit anti human $\alpha_2$ aa 432-455 (07674, Upstate) Millipore Corp 1:5 000 dilution | 100                                           | $\alpha_2$ -isoform:~ 110 kDa                                        | S2b    |                |             |           |     |
|                       |                   |                     | KI (+/-) = 1      | 30                      | 6 119 085 (AU)                                   | 59 089 772 (AU)                            |                                                                                          | 59                                            |                                                                      |        |                |             |           |     |
|                       |                   |                     | KI (-/-) = 1      | 30                      | 431 997 (AU)                                     | 56 240 436 (AU)                            |                                                                                          | 4                                             |                                                                      |        |                |             |           |     |
|                       |                   | -                   | WT (+/+) = 1      | 30                      | 38 583 437 (AU)                                  | 79 240 591 (AU)                            | Rabbit anti human GAPDH aa 1-335 (sc-25778) Santa Cruz Biotechnology Inc 1:200 dilution  | 100                                           |                                                                      |        | GAPDH:~ 35 kDa |             |           |     |
|                       |                   |                     | KI (+/-) = 1      | 30                      | 13 640 643 (AU)                                  | 46 778 927 (AU)                            |                                                                                          | 60                                            |                                                                      |        |                |             |           |     |
|                       |                   |                     | WT (+/+) = 1      | 30                      | 95 802 (QL)                                      | 134 502 (QL)                               |                                                                                          | 109                                           |                                                                      |        |                |             |           |     |
|                       |                   |                     | WT (+/+) = 1      | 30                      | 93 790 (QL)                                      | 168 938 (QL)                               |                                                                                          | 85                                            |                                                                      |        |                |             |           |     |
|                       |                   |                     | KI (+/-) = 1      | 30                      | 153 979 (QL)                                     | 221 425 (QL)                               |                                                                                          | 106                                           |                                                                      |        |                |             |           |     |
|                       |                   |                     | KI (+/-) = 1      | 30                      | 78 500 (QL)                                      | 205 570 (QL)                               |                                                                                          | 58                                            |                                                                      |        |                |             |           |     |
|                       |                   | -                   | KI (+/-) = 1      | 30                      | 82 460 (QL)                                      | 195 920 (QL)                               | 64                                                                                       |                                               |                                                                      |        |                |             |           |     |
|                       |                   |                     | KI (+/-) = 1      | 30                      | 75 448 (QL)                                      | 186 024 (QL)                               | 62                                                                                       |                                               |                                                                      |        |                |             |           |     |
|                       |                   |                     | KI (-/-) = 1      | 30                      | 13 104 (QL)                                      | 197 134 (QL)                               | 10                                                                                       |                                               |                                                                      |        |                |             |           |     |
|                       |                   |                     | New born (0 days) | -                       | WT (+/+) = 5                                     | See above                                  | See above                                                                                | See above                                     |                                                                      |        | See above      | 100 $\pm$ 4 | See above | S2c |
|                       |                   |                     |                   |                         | WT (+/-) = 5                                     |                                            |                                                                                          |                                               |                                                                      |        |                | 61 $\pm$ 1  |           |     |
|                       |                   |                     |                   |                         | WT (-/-) = 2                                     |                                            |                                                                                          |                                               |                                                                      |        |                | 7 $\pm$ 3   |           |     |

Supplementary Table 2. Western blotting – continued

| Test                  | Age (days)            | Sex (F/M)                    | Genotype            | Load (µg pr lane) | α <sub>2</sub> -protein amount (Arbitrary Units, AU) | GAPDH-protein amount (Arbitrary Units, AU) | Reagents (or indicated information)   | Relative α <sub>2</sub> -level quantification (%) | Information                                                                             | Figure                                                                   |                                                                                                |     |
|-----------------------|-----------------------|------------------------------|---------------------|-------------------|------------------------------------------------------|--------------------------------------------|---------------------------------------|---------------------------------------------------|-----------------------------------------------------------------------------------------|--------------------------------------------------------------------------|------------------------------------------------------------------------------------------------|-----|
| SDS-page Western blot | New born (0 days)     | -                            | WT (+/+)            | 30                | 2 024 365                                            | 2 932 729                                  | See above for antibodies              | 100                                               | See above for expected protein sizes                                                    | S2b                                                                      |                                                                                                |     |
|                       |                       |                              | KI (+/-)            | 30                | 1 205 054                                            | 2 867 534                                  |                                       | 61                                                |                                                                                         |                                                                          |                                                                                                |     |
|                       |                       |                              | KI (-/-)            | 30                | 208788                                               | 3 330 428                                  |                                       | 9                                                 |                                                                                         |                                                                          |                                                                                                |     |
|                       | 188-197               | F                            | WT (+/+)            | 25                | 68558                                                | 2 017 685                                  | Hippocampus, HC                       | 100                                               | Brain areas were dissected from two mice of each genotype and pooled                    |                                                                          |                                                                                                |     |
|                       |                       |                              | KI (+/-)            | 25                | 48008                                                | 2 248 450                                  | 63                                    |                                                   |                                                                                         |                                                                          |                                                                                                |     |
|                       |                       |                              | WT (+/+)            | 25                | 97 58                                                | 1 620 436                                  | Cerebellum, CRBL                      | 100                                               |                                                                                         |                                                                          |                                                                                                |     |
|                       |                       |                              | KI (+/-)            | 25                | 73674                                                | 1 807 271                                  |                                       | 68                                                |                                                                                         |                                                                          |                                                                                                |     |
|                       |                       |                              | WT (+/+)            | 25                | 75862                                                | 2 172 274                                  | Cortex, CTX                           | 100                                               |                                                                                         |                                                                          |                                                                                                |     |
|                       |                       |                              | KI (+/-)            | 25                | 68164                                                | 2 450 003                                  |                                       | 80                                                |                                                                                         |                                                                          |                                                                                                |     |
|                       |                       |                              | WT (+/+)            | 25                | 173217                                               | 1 575 130                                  | Brain stem, BS                        | 100                                               |                                                                                         |                                                                          |                                                                                                |     |
|                       | KI (+/-)              | 25                           | 79042               | 1 614 753         | 45                                                   |                                            |                                       |                                                   |                                                                                         |                                                                          |                                                                                                |     |
|                       | Adult                 | M+F                          | C5: WT brain lysate | 25                | -                                                    | -                                          | Whole brain                           | -                                                 | Pool of two mice brains                                                                 |                                                                          |                                                                                                |     |
|                       | SDS-page Western blot | Adult                        | F                   | WT (+/+)          | 20                                                   | 148208                                     | 155029                                | Brain stem, BS (pool from two mice)               | 100                                                                                     |                                                                          | Mouse anti chicken α <sub>1</sub> polypeptide of 1020 aa (DM Fambrough, DSHB) 1:1 000 dilution | S2d |
| KI (+/-)              |                       |                              |                     | 20                | 149972                                               | 151417                                     | 104                                   |                                                   |                                                                                         |                                                                          |                                                                                                |     |
| WT (+/+)              |                       |                              |                     | 20                | 133690                                               | 162681                                     | Hippocampus, HC (pool from two mice)  | 100                                               |                                                                                         |                                                                          |                                                                                                |     |
| KI (+/-)              |                       |                              |                     | 20                | 121805                                               | 134875                                     |                                       | 110                                               |                                                                                         |                                                                          |                                                                                                |     |
| WT (+/+)              |                       |                              |                     | 20                | 212654                                               | 153383                                     | Cerebellum, CRBL (pool from two mice) | 100                                               |                                                                                         |                                                                          |                                                                                                |     |
| KI (+/-)              |                       |                              |                     | 20                | 222356                                               | 139433                                     |                                       | 115                                               |                                                                                         |                                                                          |                                                                                                |     |
| WT (+/+)              |                       |                              |                     | 20                | 185274                                               | 141085                                     | Cortex, CTX (pool from two mice)      | 100                                               |                                                                                         |                                                                          |                                                                                                |     |
| KI (+/-)              |                       |                              |                     | 20                | 272220                                               | 155605                                     |                                       | 133                                               |                                                                                         |                                                                          |                                                                                                |     |
| WT (+/+)              |                       |                              | 20                  | 15451             | 16427                                                | Brain stem, BS (pool from two mice)        | 100                                   |                                                   |                                                                                         |                                                                          |                                                                                                |     |
| KI (+/-)              |                       |                              | 20                  | 15092             | 16250                                                |                                            | 99                                    |                                                   |                                                                                         |                                                                          |                                                                                                |     |
| WT (+/+)              |                       |                              | 20                  | 11209             | 19654                                                | Hippocampus, HC (pool from two mice)       | 100                                   |                                                   |                                                                                         |                                                                          |                                                                                                |     |
| KI (+/-)              |                       |                              | 20                  | 9668              | 19652                                                |                                            | 86                                    |                                                   |                                                                                         |                                                                          |                                                                                                |     |
| WT (+/+)              |                       |                              | 20                  | 18859             | 13616                                                | Cerebellum, CRBL (pool from two mice)      | 100                                   |                                                   |                                                                                         |                                                                          |                                                                                                |     |
| KI (+/-)              |                       |                              | 20                  | 21175             | 14356                                                |                                            | 106                                   |                                                   |                                                                                         |                                                                          |                                                                                                |     |
| WT (+/+)              |                       |                              | 20                  | 20131             | 16959                                                | Cortex, CTX (pool from two mice)           | 100                                   |                                                   |                                                                                         |                                                                          |                                                                                                |     |
| KI (+/-)              |                       |                              | 20                  | 18966             | 16806                                                |                                            | 95                                    |                                                   |                                                                                         |                                                                          |                                                                                                |     |
| M                     |                       |                              | WT (+/+)            | 20                | 120574                                               | 115503                                     | Brain stem, BS (pool from two mice)   | 100                                               | Rabbit anti human GAPDH aa 1-335 (sc-25778) Santa Cruz Biotechnology Inc 1:200 dilution | -                                                                        |                                                                                                |     |
|                       |                       |                              | KI (+/-)            | 20                | 103744                                               | 115737                                     |                                       | 86                                                |                                                                                         |                                                                          |                                                                                                |     |
|                       |                       |                              | WT (+/+)            | 20                | 96499                                                | 170680                                     | Hippocampus, HC (pool from two mice)  | 100                                               |                                                                                         |                                                                          |                                                                                                |     |
|                       |                       |                              | KI (+/-)            | 20                | 84293                                                | 163087                                     |                                       | 91                                                |                                                                                         |                                                                          |                                                                                                |     |
|                       |                       |                              | WT (+/+)            | 20                | 109916                                               | 111803                                     | Cerebellum, CRBL (pool from two mice) | 100                                               |                                                                                         |                                                                          |                                                                                                |     |
|                       |                       |                              | KI (+/-)            | 20                | 113856                                               | 122457                                     |                                       | 95                                                |                                                                                         |                                                                          |                                                                                                |     |
|                       |                       |                              | WT (+/+)            | 20                | 139838                                               | 140863                                     | Cortex, CTX (pool from two mice)      | 100                                               |                                                                                         |                                                                          |                                                                                                |     |
|                       |                       |                              | KI (+/-)            | 20                | 178021                                               | 139586                                     |                                       | 128                                               |                                                                                         |                                                                          |                                                                                                |     |
| M                     |                       |                              | WT (+/+)            | 20                | 11923                                                | 12902                                      | Brain stem, BS (pool from two mice)   | 100                                               |                                                                                         | Molecular weights: α <sub>1</sub> -isoform: ~ 110 kDa<br>GAPDH: ~ 35 kDa |                                                                                                | -   |
|                       |                       |                              | KI (+/-)            | 20                | 12720                                                | 14088                                      |                                       | 98                                                |                                                                                         |                                                                          |                                                                                                |     |
|                       |                       |                              | WT (+/+)            | 20                | 9303                                                 | 21282                                      | Hippocampus, HC (pool from two mice)  | 100                                               |                                                                                         |                                                                          |                                                                                                |     |
|                       |                       |                              | KI (+/-)            | 20                | 6784                                                 | 21469                                      |                                       | 72                                                |                                                                                         |                                                                          |                                                                                                |     |
|                       |                       | WT (+/+)                     | 20                  | 22211             | 12306                                                | Cerebellum, CRBL (pool from two mice)      | 100                                   |                                                   |                                                                                         |                                                                          |                                                                                                |     |
|                       |                       | KI (+/-)                     | 20                  | 15859             | 10371                                                |                                            | 85                                    |                                                   |                                                                                         |                                                                          |                                                                                                |     |
|                       |                       | WT (+/+)                     | 20                  | 18456             | 15959                                                | Cortex, CTX (pool from two mice)           | 100                                   |                                                   |                                                                                         |                                                                          |                                                                                                |     |
|                       |                       | KI (+/-)                     | 20                  | 13412             | 11263                                                |                                            | 103                                   |                                                   |                                                                                         |                                                                          |                                                                                                |     |
| M+F                   |                       | WT (+/+) = 4<br>KI (+/-) = 4 | See above           | See above         | See above                                            | See above                                  | Brain stem, BS (pool from two mice)   | 100                                               |                                                                                         |                                                                          | See above                                                                                      | S2f |
|                       |                       |                              |                     |                   |                                                      |                                            |                                       | 97 ± 4                                            |                                                                                         |                                                                          |                                                                                                |     |
|                       |                       | WT (+/+) = 4<br>KI (+/-) = 4 |                     |                   |                                                      |                                            | Hippocampus, HC (pool from two mice)  | 100                                               |                                                                                         |                                                                          |                                                                                                |     |
|                       |                       |                              |                     |                   |                                                      |                                            |                                       | 90 ± 8                                            |                                                                                         |                                                                          |                                                                                                |     |
|                       |                       | WT (+/+) = 4<br>KI (+/-) = 4 |                     |                   |                                                      |                                            | Cerebellum, CRBL (pool from two mice) | 100                                               |                                                                                         |                                                                          |                                                                                                |     |
|                       |                       |                              |                     |                   |                                                      |                                            |                                       | 100 ± 7                                           |                                                                                         |                                                                          |                                                                                                |     |
|                       |                       | WT (+/+) = 4<br>KI (+/-) = 4 |                     |                   |                                                      |                                            | Cortex, CTX (pool from two mice)      | 100                                               |                                                                                         |                                                                          |                                                                                                |     |
|                       |                       |                              |                     |                   |                                                      |                                            |                                       | 115 ± 9                                           |                                                                                         |                                                                          |                                                                                                |     |



Supplementary Table 2. Western blotting – continued

| Test                  | Age (days) | Sex (F/M) | Genotype (n) | Load (µg pr lane) | α <sub>3</sub> -protein amount (Arbitrary Units, AU) | GAPDH-protein amount (Arbitrary Units, AU) | Reagents (or indicated information)      | Relative α <sub>3</sub> -level quantification (%) (± s.e.m.) | Information                                                                                                                                                                                                                                                       | Figure |     |
|-----------------------|------------|-----------|--------------|-------------------|------------------------------------------------------|--------------------------------------------|------------------------------------------|--------------------------------------------------------------|-------------------------------------------------------------------------------------------------------------------------------------------------------------------------------------------------------------------------------------------------------------------|--------|-----|
| SDS-page Western blot | Adult      | F         | WT (+/+)     | 20                | 150399                                               | 94140                                      | Brain stem, BS<br>(pool from two mice)   | 100                                                          | Rabbit anti rat α <sub>3</sub> aa 320-514 (06172, Upstate) Millipore Corp 1:1 000 dilution<br>Rabbit anti human GAPDH aa 1-335 (sc-25778) Santa Cruz Biotechnology Inc 1:200 dilution<br>Molecular weights: α <sub>3</sub> -isoform: ~ 110 kDa<br>GAPDH: ~ 35 kDa | -      |     |
|                       |            |           | KI (+/-)     | 20                | 198658                                               | 92460                                      |                                          | 134                                                          |                                                                                                                                                                                                                                                                   |        |     |
|                       |            |           | WT (+/+)     | 20                | 111770                                               | 80556                                      | Cerebellum, CRBL<br>(pool from two mice) | 100                                                          |                                                                                                                                                                                                                                                                   |        |     |
|                       |            |           | KI (+/-)     | 20                | 147849                                               | 112936                                     |                                          | 94                                                           |                                                                                                                                                                                                                                                                   |        |     |
|                       |            |           | WT (+/+)     | 20                | 139249                                               | 130709                                     | Cortex, CTX<br>(pool from two mice)      | 100                                                          |                                                                                                                                                                                                                                                                   |        |     |
|                       |            |           | KI (+/-)     | 20                | 118444                                               | 122524                                     |                                          | 91                                                           |                                                                                                                                                                                                                                                                   |        |     |
|                       |            |           | F            | WT (+/+)          | 20                                                   | 21665                                      | 8126                                     | Brain stem, BS<br>(pool from two mice)                       |                                                                                                                                                                                                                                                                   |        | 100 |
|                       |            |           |              | KI (+/-)          | 20                                                   | 18991                                      | 13904                                    |                                                              |                                                                                                                                                                                                                                                                   |        | 51  |
|                       |            |           |              | WT (+/+)          | 20                                                   | 5583                                       | 13329                                    | Hippocampus, HC<br>(pool from two mice)                      |                                                                                                                                                                                                                                                                   |        | 100 |
|                       |            |           |              | KI (+/-)          | 20                                                   | 7889                                       | 18225                                    |                                                              |                                                                                                                                                                                                                                                                   |        | 103 |
|                       |            |           |              | WT (+/+)          | 20                                                   | 8604                                       | 12237                                    | Cerebellum, CRBL<br>(pool from two mice)                     |                                                                                                                                                                                                                                                                   |        | 100 |
|                       |            |           |              | KI (+/-)          | 20                                                   | 10736                                      | 12645                                    |                                                              |                                                                                                                                                                                                                                                                   |        | 121 |
|                       |            | WT (+/+)  |              | 20                | 9424                                                 | 10056                                      | Cortex, CTX<br>(pool from two mice)      | 100                                                          |                                                                                                                                                                                                                                                                   |        |     |
|                       |            | KI (+/-)  |              | 20                | 13522                                                | 10056                                      |                                          | 143                                                          |                                                                                                                                                                                                                                                                   |        |     |
|                       |            | M         | WT (+/+)     | 20                | 161216                                               | 108086                                     | Brain stem, BS<br>(pool from two mice)   | 100                                                          |                                                                                                                                                                                                                                                                   |        |     |
|                       |            |           | KI (+/-)     | 20                | 216706                                               | 121813                                     |                                          | 119                                                          |                                                                                                                                                                                                                                                                   |        |     |
|                       |            |           | WT (+/+)     | 20                | 41485                                                | 187226                                     | Hippocampus, HC<br>(pool from two mice)  | 100                                                          |                                                                                                                                                                                                                                                                   |        |     |
|                       |            |           | KI (+/-)     | 20                | 43255                                                | 216017                                     |                                          | 90                                                           |                                                                                                                                                                                                                                                                   |        |     |
|                       |            |           | WT (+/+)     | 20                | 46201                                                | 137354                                     | Cerebellum, CRBL<br>(pool from two mice) | 100                                                          |                                                                                                                                                                                                                                                                   |        |     |
|                       |            |           | KI (+/-)     | 20                | 54160                                                | 129385                                     |                                          | 124                                                          |                                                                                                                                                                                                                                                                   |        |     |
|                       |            | M         | WT (+/+)     | 20                | 10436                                                | 15449                                      | Hippocampus, HC<br>(pool from two mice)  | 100                                                          |                                                                                                                                                                                                                                                                   |        |     |
|                       |            |           | KI (+/-)     | 20                | 9006                                                 | 21749                                      |                                          | 61                                                           |                                                                                                                                                                                                                                                                   |        |     |
|                       |            |           | WT (+/+)     | 20                | 7068                                                 | 14595                                      | Cerebellum, CRBL<br>(pool from two mice) | 100                                                          |                                                                                                                                                                                                                                                                   |        |     |
|                       |            |           | KI (+/-)     | 20                | 5485                                                 | 15290                                      |                                          | 74                                                           |                                                                                                                                                                                                                                                                   |        |     |
|                       |            |           | WT (+/+)     | 20                | 12405                                                | 22008                                      | Cortex, CTX<br>(pool from two mice)      | 100                                                          |                                                                                                                                                                                                                                                                   |        |     |
|                       |            |           | KI (+/-)     | 20                | 7411                                                 | 16430                                      |                                          | 80                                                           |                                                                                                                                                                                                                                                                   |        |     |
|                       |            | F         | WT (+/+)     | 20                | 6632                                                 | 21403                                      | Hippocampus, HC<br>(pool from two mice)  | 100                                                          |                                                                                                                                                                                                                                                                   |        |     |
|                       |            |           | KI (+/-)     | 20                | 5146                                                 | 20475                                      |                                          | 81                                                           |                                                                                                                                                                                                                                                                   |        |     |
|                       |            |           | WT (+/+)     | 20                | 3527                                                 | 13960                                      | Cerebellum, CRBL<br>(pool from two mice) | 100                                                          |                                                                                                                                                                                                                                                                   |        |     |
|                       |            |           | KI (+/-)     | 20                | 3178                                                 | 16084                                      |                                          | 78                                                           |                                                                                                                                                                                                                                                                   |        |     |
|                       |            |           | WT (+/+)     | 20                | 4048                                                 | 14851                                      | Cortex, CTX<br>(pool from two mice)      | 100                                                          |                                                                                                                                                                                                                                                                   |        |     |
|                       |            |           | KI (+/-)     | 20                | 3627                                                 | 14960                                      |                                          | 89                                                           |                                                                                                                                                                                                                                                                   |        |     |
|                       |            | M         | WT (+/+)     | 20                | 20413                                                | 14947                                      | Brain stem, BS<br>(pool from two mice)   | 100                                                          |                                                                                                                                                                                                                                                                   |        |     |
|                       |            |           | KI (+/-)     | 20                | 19654                                                | 15100                                      |                                          | 95                                                           |                                                                                                                                                                                                                                                                   |        |     |
|                       |            |           | WT (+/+)     | 20                | 7089                                                 | 16555                                      | Hippocampus, HC<br>(pool from two mice)  | 100                                                          |                                                                                                                                                                                                                                                                   |        |     |
|                       |            |           | KI (+/-)     | 20                | 8548                                                 | 20934                                      |                                          | 95                                                           |                                                                                                                                                                                                                                                                   |        |     |
|                       |            |           | WT (+/+)     | 20                | 5158                                                 | 12322                                      | Cerebellum, CRBL<br>(pool from two mice) | 100                                                          |                                                                                                                                                                                                                                                                   |        |     |
|                       |            |           | KI (+/-)     | 20                | 6741                                                 | 13334                                      |                                          | 121                                                          |                                                                                                                                                                                                                                                                   |        |     |
|                       |            |           | WT (+/+)     | 20                | 6522                                                 | 13956                                      | Cortex, CTX<br>(pool from two mice)      | 100                                                          |                                                                                                                                                                                                                                                                   |        |     |
|                       |            |           | KI (+/-)     | 20                | 10558                                                | 15195                                      |                                          | 149                                                          |                                                                                                                                                                                                                                                                   |        |     |
|                       |            | M+F       | WT (+/+) = 4 | See above         | See above                                            | See above                                  | Brain stem, BS<br>(pool from two mice)   | 100                                                          |                                                                                                                                                                                                                                                                   |        |     |
|                       |            |           | KI (+/-) = 4 |                   |                                                      |                                            |                                          | 100 ± 18                                                     |                                                                                                                                                                                                                                                                   |        |     |
|                       |            | M+F       | WT (+/+) = 5 |                   |                                                      |                                            | Hippocampus, HC<br>(pool from two mice)  | 100                                                          |                                                                                                                                                                                                                                                                   |        |     |
|                       |            |           | KI (+/-) = 5 |                   |                                                      |                                            |                                          | 86 ± 7                                                       |                                                                                                                                                                                                                                                                   |        |     |
|                       |            | M+F       | WT (+/+) = 6 |                   |                                                      |                                            | Cerebellum, CRBL<br>(pool from two mice) | 100                                                          |                                                                                                                                                                                                                                                                   |        |     |
|                       |            |           | KI (+/-) = 6 |                   |                                                      |                                            |                                          | 102 ± 9                                                      |                                                                                                                                                                                                                                                                   |        |     |
|                       |            | M+F       | WT (+/+) = 5 |                   |                                                      |                                            | Cortex, CTX<br>(pool from two mice)      | 100                                                          |                                                                                                                                                                                                                                                                   |        |     |
|                       |            |           | KI (+/-) = 5 |                   |                                                      |                                            |                                          | 110 ± 15                                                     |                                                                                                                                                                                                                                                                   |        |     |

**Supplementary Table 3. CSD Electrophysiology**

| Test               | Age (days)                | Sex (F/M) | Measurement                               | Genotype/Animals (n) | Information                    | Mean   | s.e.m. | Statistical test                                                            | Correction and/or post hoc test | P-value                                                                      | Figure         |
|--------------------|---------------------------|-----------|-------------------------------------------|----------------------|--------------------------------|--------|--------|-----------------------------------------------------------------------------|---------------------------------|------------------------------------------------------------------------------|----------------|
| Electro-physiology | 175-245                   | M         | CSD propagation speed (µm/s)              | WT = 7               | -                              | 31.2   | 3.5    | Unpaired two-tailed t-test                                                  | -                               | Genotype: $P = 0.1202$                                                       | Data not shown |
|                    |                           |           |                                           | KI = 8               |                                | 47.9   | 8.9    |                                                                             |                                 |                                                                              |                |
| Electro-physiology | 175-245                   | M         | ECoG (mV) ~ effect of CSD                 | WT = 7               | <i>pre</i> CSD<br>-3 to -2 min | 0.043  | 0.004  | Linear mixed models                                                         | Paired t-test                   | <i>Pre vs. post</i> CSD<br>$P < 0.001$<br>WT: $P < 0.001$<br>KI: $P < 0.003$ | 1b             |
|                    |                           |           |                                           | KI = 7               |                                | 0.053  | 0.007  |                                                                             |                                 |                                                                              |                |
|                    |                           |           |                                           | WT = 6               | 1.5 min<br><i>post</i> CSD     | 0.020  | 0.004  |                                                                             |                                 |                                                                              |                |
|                    |                           |           |                                           | KI = 7               |                                | 0.018  | 0.002  |                                                                             |                                 |                                                                              |                |
| Electro-physiology | 175-245                   | M         | ECoG (% of <i>pre</i> CSD) ~ CSD recovery | WT = 7               | <i>pre</i> CSD<br>-3 to -2 min | 100.00 | 0.00   | Linear mixed models<br>( <i>pre</i> CSD values were used for normalization) | -                               | Genotype: $P < 0.001$                                                        | 1c<br>1d       |
|                    |                           |           |                                           | KI = 7               |                                | 100.00 | 0.00   |                                                                             |                                 |                                                                              |                |
|                    |                           |           |                                           | WT = 7               | 0-1 min<br><i>post</i> CSD     | 49.45  | 3.40   |                                                                             |                                 |                                                                              |                |
|                    |                           |           |                                           | KI = 7               |                                | 46.34  | 7.25   |                                                                             |                                 |                                                                              |                |
|                    |                           |           |                                           | WT = 6               | 1-2 min<br><i>post</i> CSD     | 44.32  | 4.38   |                                                                             |                                 |                                                                              |                |
|                    |                           |           |                                           | KI = 7               |                                | 36.65  | 6.88   |                                                                             |                                 |                                                                              |                |
|                    |                           |           |                                           | WT = 7               | 2-3 min<br><i>post</i> CSD     | 43.37  | 3.99   |                                                                             |                                 |                                                                              |                |
|                    |                           |           |                                           | KI = 7               |                                | 35.06  | 5.95   |                                                                             |                                 |                                                                              |                |
|                    |                           |           |                                           | WT = 7               | 3-4 min<br><i>post</i> CSD     | 49.59  | 5.20   |                                                                             |                                 |                                                                              |                |
|                    |                           |           |                                           | KI = 7               |                                | 35.82  | 5.62   |                                                                             |                                 |                                                                              |                |
|                    |                           |           |                                           | WT = 7               | 4-5 min<br><i>post</i> CSD     | 54.32  | 5.57   |                                                                             |                                 |                                                                              |                |
|                    |                           |           |                                           | KI = 7               |                                | 38.09  | 5.31   |                                                                             |                                 |                                                                              |                |
|                    |                           |           |                                           | WT = 7               | 5-6 min<br><i>post</i> CSD     | 58.43  | 6.30   |                                                                             |                                 |                                                                              |                |
|                    |                           |           |                                           | KI = 7               |                                | 42.17  | 5.77   |                                                                             |                                 |                                                                              |                |
|                    |                           |           |                                           | WT = 7               | 6-7 min<br><i>post</i> CSD     | 61.36  | 6.46   |                                                                             |                                 |                                                                              |                |
|                    |                           |           |                                           | KI = 7               |                                | 44.78  | 4.96   |                                                                             |                                 |                                                                              |                |
|                    |                           |           |                                           | WT = 7               | 7-8 min<br><i>post</i> CSD     | 63.54  | 6.27   |                                                                             |                                 |                                                                              |                |
|                    |                           |           |                                           | KI = 7               |                                | 48.92  | 5.36   |                                                                             |                                 |                                                                              |                |
|                    |                           |           |                                           | WT = 7               | 8-9 min<br><i>post</i> CSD     | 62.76  | 6.28   |                                                                             |                                 |                                                                              |                |
|                    |                           |           |                                           | KI = 7               |                                | 51.00  | 5.63   |                                                                             |                                 |                                                                              |                |
|                    |                           |           |                                           | WT = 7               | 9-10 min<br><i>post</i> CSD    | 63.70  | 6.27   |                                                                             |                                 |                                                                              |                |
|                    |                           |           |                                           | KI = 6               |                                | 50.92  | 6.17   |                                                                             |                                 |                                                                              |                |
|                    |                           |           |                                           | WT = 7               | 10-11 min<br><i>post</i> CSD   | 64.33  | 6.82   |                                                                             |                                 |                                                                              |                |
|                    |                           |           |                                           | KI = 7               |                                | 54.70  | 5.71   |                                                                             |                                 |                                                                              |                |
|                    |                           |           |                                           | WT = 7               | 11-12 min<br><i>post</i> CSD   | 65.14  | 6.49   |                                                                             |                                 |                                                                              |                |
|                    |                           |           |                                           | KI = 7               |                                | 56.31  | 6.60   |                                                                             |                                 |                                                                              |                |
|                    |                           |           |                                           | WT = 7               | 12-13 min<br><i>post</i> CSD   | 64.29  | 6.58   |                                                                             |                                 |                                                                              |                |
|                    |                           |           |                                           | KI = 7               |                                | 57.93  | 6.34   |                                                                             |                                 |                                                                              |                |
|                    |                           |           |                                           | WT = 7               | 13-14 min<br><i>post</i> CSD   | 65.04  | 6.25   |                                                                             |                                 |                                                                              |                |
|                    |                           |           |                                           | KI = 7               |                                | 61.70  | 6.91   |                                                                             |                                 |                                                                              |                |
|                    |                           |           |                                           | WT = 7               | 30 min<br><i>post</i> CSD      | 63.62  | 6.56   |                                                                             |                                 |                                                                              |                |
|                    |                           |           |                                           | KI = 7               |                                | 66.42  | 6.89   |                                                                             |                                 |                                                                              |                |
| WT = 7             | 45 min<br><i>post</i> CSD | 64.32     | 7.29                                      |                      |                                |        |        |                                                                             |                                 |                                                                              |                |
| KI = 6             |                           | 65.62     | 7.23                                      |                      |                                |        |        |                                                                             |                                 |                                                                              |                |
| WT = 6             | 60 min<br><i>post</i> CSD | 62.96     | 6.32                                      |                      |                                |        |        |                                                                             |                                 |                                                                              |                |
| KI = 6             |                           | 63.29     | 6.32                                      |                      |                                |        |        |                                                                             |                                 |                                                                              |                |

| Test               | Age (days) | Sex (F/M) | Measurement                             | Genotype/Animals (n) | Information               | Mean | s.e.m. | Statistical test    | P-value             | Figure   |
|--------------------|------------|-----------|-----------------------------------------|----------------------|---------------------------|------|--------|---------------------|---------------------|----------|
| Electro-physiology | 174-245    | M         | Evoked potentials (% of <i>pre</i> CSD) | WT = 8               | 15 min<br><i>post</i> CSD | 86   | 8      | Linear mixed models | Genotype: $P = 0.2$ | 1e<br>1f |
|                    |            |           |                                         | KI = 8               |                           | 89   | 8      |                     |                     |          |



**Supplementary Table 3. CSD Electrophysiology – continued**

| Test                    | Age (days) | Sex (F/M) | Measurement                                       | Genotype/Animals (n) | Information     | Mean  | s.e.m. | Statistical test    | Correction and/or post hoc test | P-value             | Figure   |
|-------------------------|------------|-----------|---------------------------------------------------|----------------------|-----------------|-------|--------|---------------------|---------------------------------|---------------------|----------|
| Laser-Doppler flowmetry | 175-245    | M         | Cerebral blood flow (CBF) (% of pre CSD baseline) | WT = 8               | pre CSD         | 100   | 0.00   | Linear mixed models | Outlier correction              | Genotype: $P > 0.3$ | 1e<br>1f |
|                         |            |           |                                                   | KI = 7               |                 | 100   | 0.00   |                     |                                 |                     |          |
|                         |            |           |                                                   | WT = 8               | 5 min post CSD  | 77.40 | 3.45   |                     |                                 |                     |          |
|                         |            |           |                                                   | KI = 7               |                 | 73.70 | 3.40   |                     |                                 |                     |          |
|                         |            |           |                                                   | WT = 8               | 10 min post CSD | 75.12 | 2.98   |                     |                                 |                     |          |
|                         |            |           |                                                   | KI = 7               |                 | 73.61 | 2.49   |                     |                                 |                     |          |
|                         |            |           |                                                   | WT = 8               | 15min post CSD  | 72.46 | 2.45   |                     |                                 |                     |          |
|                         |            |           |                                                   | KI = 7               |                 | 72.07 | 2.51   |                     |                                 |                     |          |
|                         |            |           |                                                   | WT = 8               | 20 min post CSD | 73.60 | 2.88   |                     |                                 |                     |          |
|                         |            |           |                                                   | KI = 7               |                 | 73.31 | 2.87   |                     |                                 |                     |          |
|                         |            |           |                                                   | WT = 8               | 30 min post CSD | 75.45 | 2.80   |                     |                                 |                     |          |
|                         |            |           |                                                   | KI = 7               |                 | 76.62 | 3.89   |                     |                                 |                     |          |
|                         |            |           |                                                   | WT = 8               | 40 min post CSD | 77.42 | 3.69   |                     |                                 |                     |          |
|                         |            |           |                                                   | KI = 7               |                 | 82.02 | 4.56   |                     |                                 |                     |          |
|                         |            |           |                                                   | WT = 8               | 50 min post CSD | 78.56 | 5.11   |                     |                                 |                     |          |
|                         |            |           |                                                   | KI = 7               |                 | 79.28 | 4.43   |                     |                                 |                     |          |
|                         |            |           |                                                   | WT = 7               | 60 min post CSD | 81.11 | 5.79   |                     |                                 |                     |          |
|                         |            |           |                                                   | KI = 7               |                 | 84.49 | 5.55   |                     |                                 |                     |          |

**Supplementary Table 4. Behavioral testing**

| Test       | Age (days) | Sex (F/M) | Measurement            | Compound (time <i>pre</i> test) | Genotype/Animals (n)               | Information        | Mean                               | s.e.m.                     | Statistical test                   | Correction and/or <i>post hoc</i> test | P-value                    | Figure                     |                                    |                            |                            |                            |                                    |   |                            |     |
|------------|------------|-----------|------------------------|---------------------------------|------------------------------------|--------------------|------------------------------------|----------------------------|------------------------------------|----------------------------------------|----------------------------|----------------------------|------------------------------------|----------------------------|----------------------------|----------------------------|------------------------------------|---|----------------------------|-----|
| Open field | 49-100     | F         | Distance travelled (m) | -                               | WT = 13                            | -                  | 24.91                              | 2.01                       | Unpaired two-tailed <i>t</i> -test | -                                      | Genotype: <i>P</i> = 0.010 | 2a                         |                                    |                            |                            |                            |                                    |   |                            |     |
|            |            |           |                        |                                 | KI = 18                            |                    | 18.69                              | 1.26                       |                                    |                                        |                            |                            |                                    |                            |                            |                            |                                    |   |                            |     |
|            |            |           |                        |                                 | WT = 13                            |                    | -                                  | 41.52                      | 3.35                               |                                        |                            |                            | Unpaired two-tailed <i>t</i> -test | -                          | Genotype: <i>P</i> = 0.010 | 2b                         |                                    |   |                            |     |
|            |            |           |                        |                                 | KI = 18                            |                    |                                    | 31.16                      | 2.10                               |                                        |                            |                            |                                    |                            |                            |                            |                                    |   |                            |     |
|            |            |           |                        |                                 | WT = 13                            |                    |                                    | -                          | 0.69                               |                                        |                            |                            | 0.36                               |                            |                            |                            | Unpaired two-tailed <i>t</i> -test | - | Genotype: <i>P</i> = 0.021 | 2c  |
|            |            |           |                        |                                 | KI = 18                            |                    |                                    |                            | 2.39                               |                                        |                            |                            | 0.52                               |                            |                            |                            |                                    |   |                            |     |
|            | WT = 13    | -         | 0.00                   | 0.00                            | Two-sided Fisher's exact test      | -                  |                                    |                            | Genotype: <i>P</i> = 0.028         | 2d                                     |                            |                            |                                    |                            |                            |                            |                                    |   |                            |     |
|            | KI = 18    |           | 0.39                   | 0.14                            |                                    |                    |                                    |                            |                                    |                                        |                            |                            |                                    |                            |                            |                            |                                    |   |                            |     |
|            | WT = 13    |           | -                      | 0.28                            | 0.07                               |                    | Unpaired two-tailed <i>t</i> -test |                            |                                    |                                        | -                          | Genotype: <i>P</i> = 0.402 | 2e                                 |                            |                            |                            |                                    |   |                            |     |
|            | KI = 18    |           |                        | 0.22                            | 0.04                               |                    |                                    |                            |                                    |                                        |                            |                            |                                    |                            |                            |                            |                                    |   |                            |     |
|            | 59-87      |           |                        | F                               | Distance travelled (m)             |                    | Depoprovera (20 days)              | WT = 12                    |                                    |                                        |                            |                            |                                    | -                          | 23.75                      | 1.12                       | Unpaired two-tailed <i>t</i> -test | - | Genotype: <i>P</i> = 0.095 | 2g  |
|            |            |           |                        |                                 |                                    |                    |                                    | KI = 13                    |                                    |                                        |                            |                            |                                    |                            | 20.78                      | 1.28                       |                                    |   |                            |     |
|            |            | WT = 12   |                        |                                 |                                    | -                  |                                    | 39.88                      | 1.80                               | Unpaired two-tailed <i>t</i> -test     |                            |                            |                                    |                            | -                          | Genotype: <i>P</i> = 0.083 | 2h                                 |   |                            |     |
|            |            | KI = 13   |                        |                                 |                                    |                    |                                    | 34.86                      | 2.07                               |                                        |                            |                            |                                    |                            |                            |                            |                                    |   |                            |     |
|            |            | WT = 12   | -                      |                                 |                                    |                    |                                    | 1.17                       | 0.34                               | Unpaired two-tailed <i>t</i> -test     | -                          | Genotype: <i>P</i> = 0.449 | 2i                                 |                            |                            |                            |                                    |   |                            |     |
|            |            | KI = 13   |                        |                                 |                                    |                    |                                    | 1.62                       | 0.46                               |                                        |                            |                            |                                    |                            |                            |                            |                                    |   |                            |     |
|            | WT = 12    | -         |                        | 0.00                            | 0.00                               |                    | Two-sided Fisher's exact test      | -                          | Genotype: <i>P</i> = 1.000         | 2j                                     |                            |                            |                                    |                            |                            |                            |                                    |   |                            |     |
|            | KI = 13    |           |                        | 0.08                            | 0.08                               |                    |                                    |                            |                                    |                                        |                            |                            |                                    |                            |                            |                            |                                    |   |                            |     |
|            | WT = 12    |           |                        | -                               | 0.27                               | 0.06               | Unpaired two-tailed <i>t</i> -test |                            |                                    |                                        |                            |                            |                                    | Welch's correction         | Genotype: <i>P</i> = 0.235 | 2k                         |                                    |   |                            |     |
|            | KI = 13    |           |                        |                                 | 0.18                               | 0.03               |                                    |                            |                                    |                                        |                            |                            |                                    |                            |                            |                            |                                    |   |                            |     |
|            | 43-100     |           | M                      |                                 | Distance travelled (m)             | -                  | WT = 21                            |                            |                                    |                                        | -                          | 24.18                      | 1.45                               |                            |                            |                            | Unpaired two-tailed <i>t</i> -test | - | Genotype: <i>P</i> = 0.213 | S3a |
|            |            |           |                        |                                 |                                    |                    | KI = 23                            |                            |                                    |                                        |                            | 21.76                      | 1.27                               |                            |                            |                            |                                    |   |                            |     |
|            |            | WT = 21   |                        |                                 |                                    |                    | -                                  | 40.31                      | 2.41                               | Unpaired two-tailed <i>t</i> -test     |                            | -                          | Genotype: <i>P</i> = 0.207         |                            |                            |                            | S3b                                |   |                            |     |
|            |            | KI = 23   |                        |                                 |                                    |                    |                                    | 36.23                      | 2.10                               |                                        |                            |                            |                                    |                            |                            |                            |                                    |   |                            |     |
| WT = 21    |            | -         |                        | 1.38                            |                                    |                    |                                    | 0.37                       | Unpaired two-tailed <i>t</i> -test | -                                      |                            |                            |                                    | Genotype: <i>P</i> = 0.057 | S3c                        |                            |                                    |   |                            |     |
| KI = 23    |            |           |                        | 2.52                            |                                    |                    |                                    | 0.44                       |                                    |                                        |                            |                            |                                    |                            |                            |                            |                                    |   |                            |     |
| WT = 21    | -          |           | 0.05                   | 0.05                            | Unpaired two-tailed <i>t</i> -test | Welch's correction |                                    | Genotype: <i>P</i> = 0.092 | S3d                                |                                        |                            |                            |                                    |                            |                            |                            |                                    |   |                            |     |
| KI = 23    |            |           | 0.26                   | 0.11                            |                                    |                    |                                    |                            |                                    |                                        |                            |                            |                                    |                            |                            |                            |                                    |   |                            |     |
| WT = 21    |            |           | -                      | 0.17                            | 0.02                               |                    | Unpaired two-tailed <i>t</i> -test |                            |                                    |                                        | -                          | Genotype: <i>P</i> = 0.562 | S3e                                |                            |                            |                            |                                    |   |                            |     |
| KI = 23    |            |           |                        | 0.15                            | 0.02                               |                    |                                    |                            |                                    |                                        |                            |                            |                                    |                            |                            |                            |                                    |   |                            |     |

| Test                 | Age in days (average $\pm$ s.e.m.) | Sex (F/M) | Measurement         | Compound (time <i>pre</i> test) | Genotype/Animals (n) | Information | Mean   | s.e.m. | Statistical test | P-value                    | Figure |       |
|----------------------|------------------------------------|-----------|---------------------|---------------------------------|----------------------|-------------|--------|--------|------------------|----------------------------|--------|-------|
| Accelerating rotarod | 174-195 (187 $\pm$ 4)              | F         | Latency to fall (s) | -                               | WT = 4               | Day 1       | 110.25 | 9.77   | Two-way ANOVA    | Genotype: <i>P</i> = 0.018 | 2f     |       |
|                      |                                    |           |                     |                                 |                      | Day 2       | 131.50 | 18.13  |                  |                            |        |       |
|                      |                                    |           |                     |                                 |                      | Day 3       | 133.88 | 18.62  |                  |                            |        |       |
|                      |                                    |           |                     |                                 |                      | KI = 5      | Day 1  | 94.10  |                  |                            |        | 6.34  |
|                      |                                    |           |                     |                                 |                      |             | Day 2  | 98.90  |                  |                            |        | 10.42 |
|                      |                                    |           |                     |                                 |                      |             | Day 3  | 106.80 |                  |                            |        | 11.40 |
|                      | 174-195 (184 $\pm$ 4)              | F         | Latency to fall (s) | Depoprovera (21-28 days)        | WT = 8               | Day 1       | 102.50 | 9.21   | Two-way ANOVA    | Genotype: <i>P</i> = 0.132 | 2l     |       |
|                      |                                    |           |                     |                                 |                      | Day 2       | 105.13 | 7.34   |                  |                            |        |       |
|                      |                                    |           |                     |                                 |                      | Day 3       | 123.06 | 9.22   |                  |                            |        |       |
|                      |                                    |           |                     |                                 |                      | KI = 9      | Day 1  | 105.39 |                  |                            |        | 8.16  |
|                      |                                    |           |                     |                                 |                      |             | Day 2  | 120.22 |                  |                            |        | 8.27  |
|                      |                                    |           |                     |                                 |                      |             | Day 3  | 136.00 |                  |                            |        | 7.56  |

| Test          | Age (days) | Sex (F/M) | Measurement               | Genotype/Animals (n) | Mean | s.e.m. | Statistical test                   | Correction and/or <i>post hoc</i> test | P-value                    | Figure |                    |                            |     |
|---------------|------------|-----------|---------------------------|----------------------|------|--------|------------------------------------|----------------------------------------|----------------------------|--------|--------------------|----------------------------|-----|
| Grip strength | 51-102     | F         | Grip strength/body weight | WT = 13              | 8.28 | 0.32   | Unpaired two-tailed <i>t</i> -test | Welch's correction                     | Genotype: <i>P</i> = 0.126 | S4a    |                    |                            |     |
|               |            |           |                           | KI = 17              | 7.71 | 0.14   |                                    |                                        |                            |        |                    |                            |     |
|               | 45-102     | M         |                           | WT = 22              | 7.14 | 0.26   | Unpaired two-tailed <i>t</i> -test |                                        |                            |        | Welch's correction | Genotype: <i>P</i> = 0.131 | S4b |
|               |            |           |                           | KI = 23              | 6.69 | 0.14   |                                    |                                        |                            |        |                    |                            |     |

Supplementary Table 4. Behavioral testing – continued

| Test                           | Age (days)       | Sex (F/M)        | Measurement | Compound (time pre test) | Genotype/ Animals (n) | Information | Mean                       | s.e.m.             | Statistical test                                                 | Correction and/or post hoc test | P-value              | Figure   |
|--------------------------------|------------------|------------------|-------------|--------------------------|-----------------------|-------------|----------------------------|--------------------|------------------------------------------------------------------|---------------------------------|----------------------|----------|
| Acoustic startle response, ASR | 59-98            | (2/6)<br>P=0.863 | ASR (%)     | -                        | WT = 8                | None        | 11.29                      | 1.82               | Two-way ANOVA                                                    | -                               | Genotype: P < 0.0001 | 4a<br>4d |
|                                |                  |                  |             |                          |                       | 80 dB       | 10.64                      | 1.15               |                                                                  |                                 |                      |          |
|                                |                  |                  |             |                          |                       | 90 dB       | 14.85                      | 2.44               |                                                                  |                                 |                      |          |
|                                |                  |                  |             |                          |                       | 100 dB      | 27.23                      | 2.84               |                                                                  |                                 |                      |          |
|                                |                  |                  |             |                          |                       | 105 dB      | 35.46                      | 2.64               |                                                                  |                                 |                      |          |
|                                |                  |                  |             |                          |                       | 110 dB      | 41.98                      | 3.94               |                                                                  |                                 |                      |          |
|                                | 120 dB           | 40.32            |             | 4.54                     |                       |             |                            |                    |                                                                  |                                 |                      |          |
|                                | 59-98            | (5/4)<br>P=0.805 |             | -                        | KI = 9                | None        | 8.16                       | 0.64               |                                                                  |                                 |                      |          |
|                                |                  |                  |             |                          |                       | 80 dB       | 10.78                      | 2.19               |                                                                  |                                 |                      |          |
|                                |                  |                  |             |                          |                       | 90 dB       | 20.75                      | 3.84               |                                                                  |                                 |                      |          |
|                                |                  |                  |             |                          |                       | 100 dB      | 38.74                      | 5.08               |                                                                  |                                 |                      |          |
|                                |                  |                  |             |                          |                       | 105 dB      | 52.63                      | 3.63               |                                                                  |                                 |                      |          |
|                                |                  |                  |             |                          |                       | 110 dB      | 55.67                      | 5.50               |                                                                  |                                 |                      |          |
|                                | 120 dB           | 61.12            |             | 5.99                     |                       |             |                            |                    |                                                                  |                                 |                      |          |
|                                | 78-103           | (4/3)<br>P=0.886 |             | Amantadine, AMA (30 min) | WT = 7                | None        | 9.39                       | 1.15               | Two-way ANOVA                                                    | -                               | Genotype: P = 0.814  | 4b<br>4d |
|                                |                  |                  |             |                          |                       | 80 dB       | 18.16                      | 4.71               |                                                                  |                                 |                      |          |
|                                |                  |                  |             |                          |                       | 90 dB       | 24.54                      | 7.13               |                                                                  |                                 |                      |          |
|                                |                  |                  |             |                          |                       | 100 dB      | 25.17                      | 4.55               |                                                                  |                                 |                      |          |
|                                |                  |                  |             |                          |                       | 105 dB      | 39.69                      | 4.49               |                                                                  |                                 |                      |          |
|                                |                  |                  |             |                          |                       | 110 dB      | 37.12                      | 4.98               |                                                                  |                                 |                      |          |
|                                | 120 dB           | 43.04            |             | 3.54                     |                       |             |                            |                    |                                                                  |                                 |                      |          |
|                                | 78-103           | (5/2)<br>P=0.096 |             | KI = 7                   | None                  | 10.57       | 1.82                       |                    |                                                                  |                                 |                      |          |
|                                |                  |                  |             |                          | 80 dB                 | 11.58       | 2.42                       |                    |                                                                  |                                 |                      |          |
|                                |                  |                  |             |                          | 90 dB                 | 16.67       | 3.51                       |                    |                                                                  |                                 |                      |          |
|                                |                  |                  |             |                          | 100 dB                | 32.60       | 6.52                       |                    |                                                                  |                                 |                      |          |
|                                |                  |                  |             |                          | 105 dB                | 38.00       | 4.09                       |                    |                                                                  |                                 |                      |          |
|                                |                  |                  |             |                          | 110 dB                | 38.49       | 2.05                       |                    |                                                                  |                                 |                      |          |
|                                | 120 dB           | 41.72            |             | 4.72                     |                       |             |                            |                    |                                                                  |                                 |                      |          |
| 65-93                          | (7/5)<br>P=0.338 | PBS (30 min)     | WT = 12     | None                     | 8.05                  | 0.59        | Two-way ANOVA              | -                  | Genotype: P = 0.0181                                             | 4c<br>4d                        |                      |          |
|                                |                  |                  |             | 80 dB                    | 7.60                  | 1.07        |                            |                    |                                                                  |                                 |                      |          |
|                                |                  |                  |             | 90 dB                    | 10.28                 | 1.38        |                            |                    |                                                                  |                                 |                      |          |
|                                |                  |                  |             | 100 dB                   | 20.39                 | 2.35        |                            |                    |                                                                  |                                 |                      |          |
|                                |                  |                  |             | 105 dB                   | 28.62                 | 3.58        |                            |                    |                                                                  |                                 |                      |          |
|                                |                  |                  |             | 110 dB                   | 28.94                 | 3.82        |                            |                    |                                                                  |                                 |                      |          |
| 120 dB                         | 36.02            | 4.32             |             |                          |                       |             |                            |                    |                                                                  |                                 |                      |          |
| 78-93                          | (3/2)<br>P=0.695 | PBS (30 min)     | KI = 5      | None                     | 6.56                  | 0.41        |                            |                    |                                                                  |                                 |                      |          |
|                                |                  |                  |             | 80 dB                    | 5.39                  | 0.38        |                            |                    |                                                                  |                                 |                      |          |
|                                |                  |                  |             | 90 dB                    | 6.80                  | 0.56        |                            |                    |                                                                  |                                 |                      |          |
|                                |                  |                  |             | 100 dB                   | 20.11                 | 5.15        |                            |                    |                                                                  |                                 |                      |          |
|                                |                  |                  |             | 105 dB                   | 36.20                 | 9.49        |                            |                    |                                                                  |                                 |                      |          |
|                                |                  |                  |             | 110 dB                   | 37.61                 | 5.55        |                            |                    |                                                                  |                                 |                      |          |
| 120 dB                         | 62.01            | 6.59             |             |                          |                       |             |                            |                    |                                                                  |                                 |                      |          |
| 78-93                          | See above        | PBS              | WT = 12     | 120 dB                   | 36.02                 | 4.32        | Unpaired two-tailed t-test | Welch's correction | Genotype: P = 0.0132                                             | 4d                              |                      |          |
| 78-93                          |                  | PBS              | KI = 5      | 120 dB                   | 62.01                 | 6.59        |                            |                    |                                                                  |                                 |                      |          |
| 59-98                          |                  | None             | WT = 8      | 120 dB                   | 40.32                 | 4.54        | Unpaired two-tailed t-test | -                  | None/AMA: P = 0.651<br>None/PBS: P = 0.515<br>AMA/PBS: P = 0.282 |                                 |                      |          |
| 78-103                         |                  | AMA              | WT = 7      | 120 dB                   | 43.04                 | 3.54        |                            |                    |                                                                  |                                 |                      |          |
| 78-93                          |                  | PBS              | WT = 12     | 120 dB                   | 36.02                 | 4.32        |                            |                    |                                                                  |                                 |                      |          |

\*All male and female data sets were statistically comparable (P > 0.05) and thus pooled. Test for pool of male and female data was carried out using two-way ANOVA.

Supplementary Table 4. Behavioral testing – continued

| Test           | Age (days) | Sex (F/M)           | Measurement        | Compound (time pre test) | Genotype/Animals (n) | Information                | Mean               | s.e.m.                  | Statistical test           | Correction and/or post hoc test | P-value                    | Figure |
|----------------|------------|---------------------|--------------------|--------------------------|----------------------|----------------------------|--------------------|-------------------------|----------------------------|---------------------------------|----------------------------|--------|
| Open field     | 49-100     | F                   | Groomings (n)      | -                        | WT = 12              | -                          | 1.67               | 0.28                    | Unpaired two-tailed t-test | Outlier correction              | Genotype: $P = 0.024$      | 4e     |
|                |            |                     |                    |                          | KI = 18              |                            | 2.78               | 0.33                    |                            |                                 |                            |        |
|                | 59-87      | F                   |                    | Depoprovera (20 days)    | WT = 12              |                            | 1.17               | 0.21                    | Unpaired two-tailed t-test | -                               | Genotype: $P = 0.839$      |        |
|                |            |                     |                    |                          | KI = 13              |                            | 1.23               | 0.23                    |                            |                                 |                            |        |
|                | 43-100     | M                   |                    | -                        | WT = 21              |                            | 2.57               | 0.30                    | Unpaired two-tailed t-test | -                               | Genotype: $P = 0.638$      |        |
|                |            |                     |                    |                          | KI = 23              |                            | 2.39               | 0.24                    |                            |                                 |                            |        |
|                | 49-100     | F                   |                    | -                        | WT = 12              |                            | 1.67               | 0.28                    | Unpaired two-tailed t-test | Outlier correction              | Treatment: $P = 0.169$     |        |
|                |            |                     |                    |                          | KI = 18              |                            | 1.17               | 0.21                    |                            |                                 |                            |        |
| 49-100         | F          | -                   | WT = 12            | 2.78                     | 0.33                 | Unpaired two-tailed t-test | -                  | Treatment: $P = 0.0013$ |                            |                                 |                            |        |
|                |            |                     | KI = 13            | 1.23                     | 0.23                 |                            |                    |                         |                            |                                 |                            |        |
| Marble burying | 41-106     | F                   | Marbles buried (n) | -                        | WT = 25              | -                          | 8.52               | 1.12                    | Unpaired two-tailed t-test | -                               | Genotype: $P = 0.002$      | 4f     |
|                |            |                     |                    |                          | KI = 23              |                            | 14.09              | 1.29                    |                            |                                 |                            |        |
|                | 41-104     | M                   |                    | -                        | WT = 31              |                            | 13.84              | 1.11                    | Unpaired two-tailed t-test | -                               | Genotype: $P = 0.184$      |        |
|                |            |                     |                    |                          | KI = 14              |                            | 11.00              | 1.96                    |                            |                                 |                            |        |
|                | 84-200     | F                   |                    | Amantadine (30 min)      | WT = 11              |                            | 2.91               | 0.74                    | Unpaired two-tailed t-test | Welch's correction              | Genotype: $P = 0.626$      |        |
|                |            |                     |                    |                          | KI = 9               |                            | 4.11               | 2.26                    |                            |                                 |                            |        |
|                | 84-195     | F                   |                    | PBS (30 min)             | WT = 11              |                            | 8.73               | 1.61                    | Unpaired two-tailed t-test | -                               | Genotype: $P = 0.0004$     |        |
|                |            |                     |                    |                          | KI = 8               |                            | 19.38              | 1.81                    |                            |                                 |                            |        |
|                | 62-196     | F                   |                    | Depoprovera (18-33 days) | WT = 18              |                            | 9.44               | 1.34                    | Unpaired two-tailed t-test | -                               | Genotype: $P = 0.702$      |        |
|                |            |                     |                    |                          | KI = 20              |                            | 8.70               | 1.37                    |                            |                                 |                            |        |
|                | See above  | F                   |                    | PBS vs Amantadine        | WT = 11              |                            | 8.73               | 1.61                    | One-way ANOVA              | Tukey's post hoc                | Genotype: $P > 0.05$ , ns  |        |
|                |            |                     |                    |                          | WT = 11              |                            | 2.91               | 0.74                    |                            |                                 |                            |        |
|                | See above  | F                   |                    | PBS vs Amantadine        | KI = 8               |                            | 19.38              | 1.81                    | One-way ANOVA              | Tukey's post hoc                | Genotype: $P < 0.05$ , *** |        |
|                |            |                     |                    |                          | KI = 9               |                            | 4.11               | 2.26                    |                            |                                 |                            |        |
|                | See above  | F                   |                    | None vs Depoprovera      | WT = 25              |                            | 8.52               | 1.12                    | One-way ANOVA              | Tukey's post hoc                | Genotype: $P > 0.05$ , ns  |        |
|                |            |                     |                    |                          | WT = 18              |                            | 9.44               | 1.34                    |                            |                                 |                            |        |
| See above      | F          | None vs Depoprovera | KI = 23            | 14.09                    | 1.29                 | One-way ANOVA              | Tukey's post hoc   | Genotype: $P < 0.05$ ,  |                            |                                 |                            |        |
|                |            |                     | KI = 20            | 8.70                     | 1.37                 |                            |                    |                         |                            |                                 |                            |        |
| 50-81          | F          | Memantine (30 min)  | WT = 11            | 13.27                    | 1.46                 | Unpaired two-tailed t-test | -                  | Genotype: $P = 0.776$   |                            |                                 |                            |        |
|                |            |                     | KI = 10            | 12.70                    | 1.32                 |                            |                    |                         |                            |                                 |                            |        |
| 41-76          | F          | PBS (30 min)        | WT = 15            | 12.80                    | 1.02                 | Unpaired two-tailed t-test | Welch's correction | Genotype: $P = 0.0051$  |                            |                                 |                            |        |
|                |            |                     | KI = 10            | 19.50                    | 1.11                 |                            |                    |                         |                            |                                 |                            |        |
| See above      | F          | PBS vs Memantine    | WT = 15            | 12.80                    | 1.02                 | Unpaired two-tailed t-test | -                  | Genotype: $P = 0.725$   |                            |                                 |                            |        |
|                |            |                     | WT = 11            | 13.27                    | 1.46                 |                            |                    |                         |                            |                                 |                            |        |
| See above      | F          | PBS vs Memantine    | KI = 10            | 19.50                    | 1.11                 | Unpaired two-tailed t-test | -                  | Genotype: $P = 0.01$    |                            |                                 |                            |        |
|                |            |                     | KI = 10            | 12.70                    | 1.32                 |                            |                    |                         |                            |                                 |                            |        |

| Test                    | Age (days) | Sex (F/M) | Measurement          | Genotype/Animals (n) | Information | Mean   | s.e.m. | Statistical test           | Correction and/or post hoc test | P-value               | Figure |
|-------------------------|------------|-----------|----------------------|----------------------|-------------|--------|--------|----------------------------|---------------------------------|-----------------------|--------|
| Elevated plus maze, EPM | 57-65      | (5/5)     | Distance (cm)        | WT = 10              | -           | 14.77  | 1.05   | Unpaired two-tailed t-test | -                               | Genotype: $P = 0.739$ | S7a    |
|                         |            |           |                      | KI = 10              |             | 15.30  | 1.17   |                            |                                 |                       |        |
|                         | 57-65      | (5/5)     | Open arm time (%)    | WT = 10              |             | 6.90   | 1.58   | Unpaired two-tailed t-test | -                               | Genotype: $P = 0.878$ |        |
|                         |            |           |                      | KI = 10              |             | 7.24   | 1.47   |                            |                                 |                       |        |
|                         | 57-65      | (5/5)     | Open arm entries (%) | WT = 10              |             | 29.71  | 2.88   | Unpaired two-tailed t-test | -                               | Genotype: $P = 0.337$ |        |
|                         |            |           |                      | KI = 10              |             | 25.77  | 2.77   |                            |                                 |                       |        |
|                         | 57-65      | (5/5)     | Line crossings (n)   | WT = 10              |             | 112.10 | 7.16   | Unpaired two-tailed t-test | -                               | Genotype: $P = 0.556$ |        |
|                         |            |           |                      | KI = 10              |             | 104.80 | 9.83   |                            |                                 |                       |        |
|                         | 95-110     | (5/5)     | Distance (cm)        | WT = 10              |             | 13.17  | 1.11   | Unpaired two-tailed t-test | -                               | Genotype: $P = 0.312$ |        |
|                         |            |           |                      | KI = 10              |             | 11.77  | 0.76   |                            |                                 |                       |        |
|                         | 95-110     | (5/5)     | Open arm time (%)    | WT = 10              |             | 4.43   | 1.63   | Unpaired two-tailed t-test | -                               | Genotype: $P = 0.626$ |        |
|                         |            |           |                      | KI = 10              |             | 3.39   | 1.33   |                            |                                 |                       |        |
|                         | 95-110     | (5/5)     | Open arm entries (%) | WT = 10              |             | 20.56  | 1.66   | Unpaired two-tailed t-test | Welch's correction              | Genotype: $P = 0.437$ |        |
|                         |            |           |                      | KI = 10              |             | 17.45  | 3.50   |                            |                                 |                       |        |

\*All male and female data sets were statistically comparable ( $P > 0.05$ ) and thus pooled. Test for pool of male and female data was carried out using one-way ANOVA with Tukey's post hoc comparison test (data sets with same variance (Bartlett's test) or Kruskal-Wallis with Dunn's post hoc comparison test (data sets with unequal variance (Bartlett's test); the latter is denoted with \*).

**Supplementary Table 4. Behavioral testing – continued**

| Test                            | Age (days) | Sex (F/M) | Measurement       | Genotype/Animals (n) | Information | Mean          | s.e.m.           | Statistical test        | Correction and/or post hoc test | P-value                 | Figure |
|---------------------------------|------------|-----------|-------------------|----------------------|-------------|---------------|------------------|-------------------------|---------------------------------|-------------------------|--------|
| Three-chamber social preference | 85-100     | F         | Chamber time (s)  | WT = 5               | Stranger, S | 161.00        | 14.88            | One-way ANOVA           | Tukey's post hoc                | S vs E: $P < 0.05$ , ** | 5a     |
|                                 |            |           |                   |                      | Center, C   | 162.10        | 20.14            |                         |                                 |                         |        |
|                                 |            |           |                   |                      | Empty, E    | 61.18         | 17.26            |                         |                                 |                         |        |
|                                 | 96-100     | F         |                   | KI = 5               | Stranger, S | 138.10        | 12.28            | One-way ANOVA           | Tukey's post hoc                | S vs E: $P > 0.05$ , ns |        |
|                                 |            |           |                   |                      | Center, C   | 119.90        | 18.09            |                         |                                 |                         |        |
|                                 |            |           |                   |                      | Empty, E    | 100.10        | 8.53             |                         |                                 |                         |        |
|                                 | 85-100     | M         |                   | WT = 5               | Stranger, S | 176.30        | 18.56            | One-way ANOVA           | Tukey's post hoc                | S vs E: $P < 0.05$ , ** |        |
|                                 |            |           |                   |                      | Center, C   | 90.98         | 16.84            |                         |                                 |                         |        |
|                                 |            |           |                   |                      | Empty, E    | 98.88         | 16.09            |                         |                                 |                         |        |
|                                 | 85-100     | M         | KI = 5            | Stranger, S          | 126.00      | 8.39          | One-way ANOVA    | Tukey's post hoc        | S vs E: $P > 0.05$ , ns         |                         |        |
|                                 |            |           |                   | Center, C            | 149.70      | 37.05         |                  |                         |                                 |                         |        |
|                                 |            |           |                   | Empty, E             | 97.74       | 6.07          |                  |                         |                                 |                         |        |
|                                 | 85-100     | F         | Sniffing time (s) | WT = 5               | Stranger, S | 157.70        | 17.91            | One-way ANOVA           | Tukey's post hoc                | S vs E: $P < 0.05$ , ** | 5b     |
|                                 |            |           |                   |                      | Empty, E    | 63.84         | 14.86            |                         |                                 |                         |        |
|                                 |            |           |                   |                      | 96-100      | F             | KI = 5           |                         |                                 |                         |        |
|                                 | Empty, E   | 95.52     |                   | 10.64                |             |               |                  |                         |                                 |                         |        |
|                                 | 85-100     | M         |                   | WT = 5               |             |               |                  | Stranger, S             | 167.30                          | 24.59                   |        |
|                                 |            |           |                   |                      | Empty, E    | 73.58         | 13.47            |                         |                                 |                         |        |
|                                 |            |           |                   |                      | 85-100      | M             | KI = 5           | Stranger, S             | 133.30                          | 27.05                   |        |
|                                 | Empty, E   | 84.74     |                   | 7.96                 |             |               |                  |                         |                                 |                         |        |
|                                 | 85-100     | F         |                   | Chamber entries (n)  |             |               |                  | WT = 5                  | Stranger, S                     | 67.20                   |        |
|                                 |            |           | Center, C         |                      | 13.00       | 2.30          |                  |                         |                                 |                         |        |
|                                 |            |           | Empty, E          |                      | 28.00       | 5.41          |                  |                         |                                 |                         |        |
|                                 | 96-100     | F         | KI = 5            |                      | Stranger, S | 72.80         | 6.28             | One-way ANOVA           | Tukey's post hoc                | S vs E: $P > 0.05$ , ns |        |
| Center, C                       |            |           |                   |                      | 24.40       | 2.40          |                  |                         |                                 |                         |        |
| Empty, E                        |            |           |                   |                      | 52.20       | 3.06          |                  |                         |                                 |                         |        |
| 85-100                          | M          | WT = 5    | Stranger, S       |                      | 84.60       | 5.01          | One-way ANOVA    | Tukey's post hoc        | S vs E: $P < 0.05$ , **         |                         |        |
|                                 |            |           | Center, C         |                      | 20.60       | 1.12          |                  |                         |                                 |                         |        |
|                                 |            |           | Empty, E          |                      | 46.40       | 9.68          |                  |                         |                                 |                         |        |
| 85-100                          | M          | KI = 5    | Stranger, S       | 61.60                | 9.79        | One-way ANOVA | Tukey's post hoc | S vs E: $P > 0.05$ , ns |                                 |                         |        |
|                                 |            |           | Center, C         | 19.40                | 3.11        |               |                  |                         |                                 |                         |        |
|                                 |            |           | Empty, E          | 36.60                | 4.23        |               |                  |                         |                                 |                         |        |

**Supplementary Table 4. Behavioral testing – continued**

| Test                  | Age (days) | Sex (F/M)        | Measurement                    | Genotype/Animals | Information | Mean   | s.e.m.                     | Statistical test | Correction and/or post hoc test | P-value                | Figure |
|-----------------------|------------|------------------|--------------------------------|------------------|-------------|--------|----------------------------|------------------|---------------------------------|------------------------|--------|
| Tail suspension (TST) | 75-194     | (4/17)           | Immobility (s)                 | WT = 21          | 0-2 min     | 22.59  | 3.17                       | Two-way ANOVA    | -                               | Genotype: $P = 0.0033$ | 6a     |
|                       |            |                  |                                |                  | 2-4 min     | 42.89  | 2.98                       |                  |                                 |                        |        |
|                       |            |                  |                                |                  | 4-6 min     | 45.53  | 5.08                       |                  |                                 |                        |        |
|                       |            |                  |                                | KI = 16          | 0-2 min     | 29.96  | 3.90                       |                  |                                 |                        |        |
|                       |            |                  |                                |                  | 2-4 min     | 56.73  | 6.33                       |                  |                                 |                        |        |
|                       |            |                  |                                |                  | 4-6 min     | 59.38  | 6.84                       |                  |                                 |                        |        |
|                       | 75-194     | (4/17)           | Absolute turn angles (degrees) | WT = 21          | 0-2 min     | 48.142 | 1.864                      | Two-way ANOVA    | -                               | Genotype: $P < 0.0001$ | 6b     |
|                       |            |                  |                                |                  | 2-4 min     | 33.526 | 2.042                      |                  |                                 |                        |        |
|                       |            |                  |                                |                  | 4-6 min     | 30.922 | 3.072                      |                  |                                 |                        |        |
|                       |            |                  |                                | KI = 16          | 0-2 min     | 40.554 | 2.333                      |                  |                                 |                        |        |
|                       |            |                  |                                |                  | 2-4 min     | 20.327 | 2.855                      |                  |                                 |                        |        |
|                       |            |                  |                                |                  | 4-6 min     | 17.242 | 2.756                      |                  |                                 |                        |        |
|                       | 75-194     | (4/17)           | Rotations (n)                  | WT = 21          | 0-2 min     | 2.80   | 0.64                       | Two-way ANOVA    | Outlier correction              | Genotype: $P < 0.0001$ | 6c     |
|                       |            |                  |                                |                  | 2-4 min     | 2.19   | 0.67                       |                  |                                 |                        |        |
|                       |            |                  |                                |                  | 4-6 min     | 1.29   | 0.35                       |                  |                                 |                        |        |
|                       |            |                  |                                | KI = 16          | 0-2 min     | 0.67   | 0.46                       |                  |                                 |                        |        |
|                       |            |                  |                                |                  | 2-4 min     | 0.07   | 0.07                       |                  |                                 |                        |        |
|                       |            |                  |                                |                  | 4-6 min     | 0.00   | 0.00                       |                  |                                 |                        |        |
|                       | 75-194     | (4/17)           | Mobility (s)                   | WT = 21          | 0-2 min     | 97.42  | 3.17                       | Two-way ANOVA    | -                               | Genotype: $P = 0.0014$ | 6d     |
|                       |            |                  |                                |                  | 2-4 min     | 77.11  | 2.98                       |                  |                                 |                        |        |
|                       |            |                  |                                |                  | 4-6 min     | 73.34  | 5.17                       |                  |                                 |                        |        |
|                       |            |                  |                                | KI = 16          | 0-2 min     | 90.06  | 3.90                       |                  |                                 |                        |        |
|                       |            |                  |                                |                  | 2-4 min     | 63.29  | 6.33                       |                  |                                 |                        |        |
|                       |            |                  |                                |                  | 4-6 min     | 55.88  | 6.92                       |                  |                                 |                        |        |
| 75-194                | (4/17)     | Vocalization (%) | WT = 21                        | 6 min            | 14.29       | 7.83   | Unpaired two-tailed t-test | -                | Genotype: $P = 0.0179$          | 6e                     |        |
| 59-194                | (9/7)      |                  | KI = 16                        | 6 min            | 50.00       | 12.91  |                            |                  |                                 |                        |        |

\*All male and female data sets were statistically comparable ( $P > 0.05$ ) and thus pooled. Test for pool of male and female data was carried out using one-way ANOVA with Tukey's post hoc comparison test (data sets with same variance (Bartlett's test) or Kruskal-Wallis with Dunn's post hoc comparison test (data sets with unequal variance (Bartlett's test); the latter is denoted with \*).

| Test                              | Age (days)                        | Sex (F/M) | Cages (n) | Measurement        | Genotype/Animals (n) | Information | Mean                       | s.e.m.                     | Statistical test                              | Correction and/or post hoc test                    | P-values                                           | Figure                                             |    |
|-----------------------------------|-----------------------------------|-----------|-----------|--------------------|----------------------|-------------|----------------------------|----------------------------|-----------------------------------------------|----------------------------------------------------|----------------------------------------------------|----------------------------------------------------|----|
| Stress-induced sucrose preference | 158-213                           | (6/7)     | n = 5     | Sucrose intake (%) | WT = 13              | -           | 97.59                      | 0.46                       | Unpaired two-tailed t-test                    | -                                                  | Genotype: $P = 0.796$                              | 6f                                                 |    |
|                                   | 158-213                           | (7/8)     | n = 6     |                    | KI = 15              | -           | 97.38                      | 0.59                       |                                               |                                                    |                                                    |                                                    |    |
|                                   | 158-213                           | (6/7)     | n = 5     |                    | WT = 13              | Stress I    | 97.78                      | 0.40                       | Unpaired two-tailed t-test                    | -                                                  | WT vs KI: $P = 0.368$<br>WT vs KI-a: $P = 0.045$   |                                                    |    |
|                                   | 158-213                           | (4/3)     | n = 2     |                    | KI = 7               |             | 95.96                      | 0.92                       |                                               |                                                    |                                                    |                                                    |    |
|                                   | 158-213                           | (3/5)     | n = 4     |                    | KI-a = 8             | 92.98       | 1.70                       | Unpaired two-tailed t-test | -                                             | WT vs KI-a: $P = 0.0012$                           |                                                    |                                                    |    |
|                                   | 158-213                           | (3/7)     | n = 4     |                    | WT = 10              | 96.82       | 0.32                       |                            |                                               |                                                    |                                                    |                                                    |    |
|                                   | 158-213                           | (3/0)     | n = 1     |                    | WT-a = 3             | Stress II   | 88.96                      | 0.00                       | Unpaired two-tailed t-test                    | -                                                  | WT vs KI-a: $P = 0.0012$                           |                                                    |    |
|                                   | 158-213                           | (0/3)     | n = 1     |                    | KI = 3               |             | 97.31                      | 0.00                       |                                               |                                                    |                                                    |                                                    |    |
|                                   | 158-213                           | (7/5)     | n = 5     |                    | KI-a = 12            | 91.28       | 0.90                       | Unpaired two-tailed t-test | -                                             | None vs SI: $P = 0.217$<br>None vs S2: $P = 0.230$ |                                                    |                                                    |    |
|                                   | 158-213                           | (6/7)     | n = 5     |                    | WT = 13              | -           | 97.59                      |                            |                                               |                                                    | 0.46                                               |                                                    |    |
|                                   | 158-213                           | (6/7)     | n = 5     |                    | WT = 13              | Stress I    | 97.78                      | 0.40                       | Unpaired two-tailed t-test                    | -                                                  | None vs SI: $P = 0.217$<br>None vs S2: $P = 0.230$ |                                                    |    |
|                                   | 158-213                           | (3/7)     | n = 4     |                    | WT = 10              | Stress II   | 96.82                      | 0.32                       |                                               |                                                    |                                                    |                                                    |    |
|                                   | Stress-induced sucrose preference | 158-213   | (6/7)     | n = 5              | Liquid/mouse/day (g) | WT = 13     | -                          | 13.78                      | 2.79                                          | Unpaired two-tailed t-test                         | -                                                  | Genotype: $P = 0.265$                              | 6g |
|                                   |                                   | 158-213   | (7/8)     | n = 6              |                      | KI = 15     | -                          | 10.23                      | 1.44                                          |                                                    |                                                    |                                                    |    |
|                                   |                                   | 158-213   | (6/7)     | n = 5              |                      | WT = 13     | Stress I                   | 17.23                      | 1.64                                          | Unpaired two-tailed t-test                         | -                                                  | WT vs KI: $P = 0.332$<br>WT vs KI-a: $P = 0.011$   |    |
|                                   |                                   | 158-213   | (4/3)     | n = 2              |                      | KI = 7      |                            | 13.82                      | 3.04                                          |                                                    |                                                    |                                                    |    |
|                                   |                                   | 158-213   | (3/5)     | n = 4              |                      | KI-a = 8    | 10.40                      | 0.77                       | Unpaired two-tailed t-test                    | -                                                  | WT vs KI-a: $P = 0.001$                            |                                                    |    |
|                                   |                                   | 158-213   | (3/7)     | n = 4              |                      | WT = 10     | 18.15                      | 1.56                       |                                               |                                                    |                                                    |                                                    |    |
|                                   |                                   | 158-213   | (3/0)     | n = 1              |                      | WT-a = 3    | Stress II                  | 7.74                       | 0.00                                          | Unpaired two-tailed t-test                         | -                                                  | WT vs KI-a: $P = 0.001$                            |    |
|                                   |                                   | 158-213   | (0/3)     | n = 1              |                      | KI = 3      |                            | 12.07                      | 0.00                                          |                                                    |                                                    |                                                    |    |
|                                   |                                   | 158-213   | (7/5)     | n = 5              |                      | KI-a = 12   | 9.57                       | 0.74                       | Unpaired two-tailed t-test                    | -                                                  | None vs SI: $P = 0.318$<br>None vs S2: $P = 0.246$ |                                                    |    |
|                                   |                                   | 158-213   | (6/7)     | n = 5              |                      | WT = 13     | -                          | 13.78                      |                                               |                                                    |                                                    | 2.79                                               |    |
|                                   |                                   | 158-213   | (6/7)     | n = 5              |                      | WT = 13     | Stress I                   | 17.23                      | 1.64                                          | Unpaired two-tailed t-test                         | -                                                  | None vs SI: $P = 0.318$<br>None vs S2: $P = 0.246$ |    |
|                                   |                                   | 158-213   | (3/7)     | n = 4              |                      | WT = 10     | Stress II                  | 18.15                      | 1.56                                          |                                                    |                                                    |                                                    |    |
| 158-213                           | (6/7)                             | n = 5     | WT = 13   | -                  | 13.78                | 2.79        | Unpaired two-tailed t-test | -                          | WT vs KI-a SI: $P = 0.308$<br>WT vs KI-a SII: |                                                    |                                                    |                                                    |    |
| 158-213                           | (3/5)                             | n = 4     | KI-a = 8  | Stress I           | 10.40                | 0.77        |                            |                            |                                               |                                                    |                                                    |                                                    |    |
| 158-213                           | (7/5)                             | n = 5     | KI-a = 12 | Stress II          | 9.57                 | 0.74        | Unpaired two-tailed t-test | Welch's correction         | WT vs KI-a SI: $P = 0.308$<br>WT vs KI-a SII: |                                                    |                                                    |                                                    |    |

\*All male and female data sets were statistically comparable ( $P > 0.05$ ) and thus pooled. Test for pool of male and female data was carried out using one-way ANOVA with Tukey's post hoc comparison test (data sets with same variance (Bartlett's test) or Kruskal-Wallis with Dunn's post hoc comparison test (data sets with unequal variance (Bartlett's test); the latter is denoted with \*).

**Supplementary Table 5. Estradiol and glutamate assays, and [<sup>3</sup>H] aspartate uptake**

| Test             | Age (days)            | Sex (F/M)                                           | Measurement                                         | Genotype/Animals (n)     | Information                                    | Mean                                                 | s.e.m.                                     | Statistical test                                                                                                  | Correction and/or post hoc test               | P-value                                    | Figure                                                                 |        |                            |   |                                                                        |    |
|------------------|-----------------------|-----------------------------------------------------|-----------------------------------------------------|--------------------------|------------------------------------------------|------------------------------------------------------|--------------------------------------------|-------------------------------------------------------------------------------------------------------------------|-----------------------------------------------|--------------------------------------------|------------------------------------------------------------------------|--------|----------------------------|---|------------------------------------------------------------------------|----|
| Estradiol        | 48-123                | F                                                   | Estradiol (pg/mL)                                   | WT = 8                   | Untreated                                      | 6.68                                                 | 0.96                                       | Unpaired two-tailed t-test (relative to no treatment)                                                             | -                                             | -                                          | S5                                                                     |        |                            |   |                                                                        |    |
|                  |                       |                                                     |                                                     | WT = 10                  | Depoprovera, P8                                | 6.47                                                 | 0.57                                       |                                                                                                                   |                                               | Treatment: P = 0.841                       |                                                                        |        |                            |   |                                                                        |    |
|                  |                       |                                                     |                                                     | WT = 14                  | Depoprovera, P18                               | 4.95                                                 | 0.46                                       |                                                                                                                   |                                               | Treatment: P = 0.079                       |                                                                        |        |                            |   |                                                                        |    |
|                  | 114                   | M                                                   | WT = 3                                              | Untreated                | 4.50                                           | 1.40                                                 | -                                          | -                                                                                                                 | -                                             |                                            |                                                                        |        |                            |   |                                                                        |    |
| Test             | Age (days)            | Sex (F/M)                                           | Measurement                                         | Compound (time pre test) | Genotype/Animals (n)                           | Information                                          | Mean                                       | s.e.m.                                                                                                            | Statistical test                              | Correction and/or post hoc test            | P-values                                                               | Figure |                            |   |                                                                        |    |
| Glutamate assay  | 128-242               | F                                                   | Glutamate (nmoles/20 µg protein)                    | -                        | WT = 2 × 5                                     | CTX                                                  | 3.40                                       | 0.12                                                                                                              | Unpaired two-tailed t-test                    | -                                          | Genotype: P = 0.009                                                    | 3a     |                            |   |                                                                        |    |
|                  |                       |                                                     |                                                     |                          | KI = 2 × 5                                     |                                                      | 3.99                                       | 0.16                                                                                                              |                                               |                                            | Genotype: P = 0.026                                                    | 3b     |                            |   |                                                                        |    |
|                  |                       |                                                     |                                                     |                          | WT = 2 × 5                                     | HC                                                   | 4.05                                       | 0.21                                                                                                              | Unpaired two-tailed t-test                    | -                                          | Genotype: P = 0.0007                                                   | 3c     |                            |   |                                                                        |    |
|                  |                       |                                                     |                                                     |                          | KI = 2 × 5                                     |                                                      | 2.67                                       | 0.12                                                                                                              |                                               |                                            |                                                                        |        |                            |   |                                                                        |    |
|                  |                       |                                                     |                                                     |                          | 196-233                                        | F                                                    | Glutamate (nmoles/20 µg protein)           | Depoprovera (28 days)                                                                                             | WT = 1 × 5                                    | CTX                                        | 2.88                                                                   | 0.18   | Unpaired two-tailed t-test | - | Genotype: P = 0.455<br>+/- DP, WT: P = 0.032<br>+/- DP, KI: P = 0.0003 | 3a |
|                  |                       |                                                     |                                                     |                          |                                                |                                                      |                                            |                                                                                                                   | KI = 1 × 5                                    |                                            | 2.73                                                                   | 0.07   |                            |   | Genotype: P = 0.056                                                    | 3b |
|                  | WT = 1 × 5            | HC                                                  | 2.82                                                | 0.08                     |                                                |                                                      |                                            |                                                                                                                   | Unpaired two-tailed t-test                    | Welch's correction                         | +/- DP, WT: P = 0.112<br>+/- DP, KI: P = 0.0002                        | 3b     |                            |   |                                                                        |    |
|                  | KI = 1 × 5            |                                                     | 2.59                                                | 0.04                     |                                                |                                                      |                                            |                                                                                                                   |                                               |                                            | Genotype: P = 0.942<br>+/- DP, WT: P = 0.169<br>+/- DP, KI: P = 0.0004 | 3c     |                            |   |                                                                        |    |
|                  | WT = 1 × 5            | CRBL                                                | 2.40                                                | 0.06                     |                                                |                                                      |                                            |                                                                                                                   | Unpaired two-tailed t-test                    | -                                          | -                                                                      | -      |                            |   |                                                                        |    |
|                  | KI = 1 × 5            |                                                     | 2.39                                                | 0.12                     |                                                |                                                      |                                            |                                                                                                                   |                                               |                                            |                                                                        |        |                            |   |                                                                        |    |
|                  | Test                  | Age (days)                                          | In vitro cultures                                   | Genotype                 | Load (µg pr lane)                              | α <sub>2</sub> -protein amount (Arbitrary Units, AU) | Actin-protein amount (Arbitrary Units, AU) | Reagents (or indicated information)                                                                               | Relative α <sub>2</sub> -level quantification | Information                                | Figure                                                                 |        |                            |   |                                                                        |    |
|                  | SDS-page Western blot | E17                                                 | Mixed culture of astrocytes and neurons (passage 1) | WT (+/+)                 | 100                                            | 61115                                                | 645                                        | Rabbit anti-human α (07674, Upstate): 1:3 000 dilution<br>Mouse anti-chicken actin (612656, BD): 1:3 000 dilution | 100                                           | α <sub>2</sub> - 110 kDa<br>actin: ~42 kDa | -                                                                      |        |                            |   |                                                                        |    |
| KI (+/-)         |                       |                                                     |                                                     | 100                      | 17984                                          | 581                                                  | 33                                         |                                                                                                                   |                                               |                                            |                                                                        |        |                            |   |                                                                        |    |
| KI (-/-)         |                       |                                                     |                                                     | 100                      | 467                                            | 569<br>33                                            | <1                                         |                                                                                                                   |                                               |                                            |                                                                        |        |                            |   |                                                                        |    |
| Test             | Age (days)            | In vitro cultures                                   | Genotype                                            | Samples (n)              | Measure                                        | Mean*                                                | s.e.m.                                     | Statistical test                                                                                                  | Correction and/or post hoc test               | P-values                                   | Figure                                                                 |        |                            |   |                                                                        |    |
| Glutamate uptake | E17                   | Mixed culture of astrocytes and neurons (passage 1) | WT (+/+)                                            | n = 22                   | [ <sup>3</sup> H]-D-aspartate uptake (% of WT) | 100.0                                                | 2.9                                        | One-way ANOVA                                                                                                     | -                                             | Tukey's post hoc                           | WT: P > 0.05, ns<br>WT: P < 0.05, **                                   | 3d     |                            |   |                                                                        |    |
|                  |                       |                                                     | KI (+/-)                                            | n = 23                   |                                                | 89.6                                                 | 2.                                         |                                                                                                                   |                                               |                                            |                                                                        |        |                            |   |                                                                        |    |
|                  |                       |                                                     | KI (-/-)                                            | n = 13                   |                                                | 83.4                                                 | 5.<br>3                                    |                                                                                                                   |                                               |                                            |                                                                        |        |                            |   |                                                                        |    |

\*Absolute numbers below

| [ <sup>3</sup> H]-D-aspartate uptake (absolute values)<br>(Numbers sequentially, separated by /) |                                                                                                                    |                                                                                                                                                                                                                                          |                                                                                                                                                                                                                                                                                 |                               |
|--------------------------------------------------------------------------------------------------|--------------------------------------------------------------------------------------------------------------------|------------------------------------------------------------------------------------------------------------------------------------------------------------------------------------------------------------------------------------------|---------------------------------------------------------------------------------------------------------------------------------------------------------------------------------------------------------------------------------------------------------------------------------|-------------------------------|
| Genotype                                                                                         | Counts per minute (CPM)                                                                                            | Protein ug/ul                                                                                                                                                                                                                            | CPM/Protein                                                                                                                                                                                                                                                                     | Days in culture (mean +/- SD) |
| WT (n=22)                                                                                        | 10201/9254/6729/7449/8363/9543/7826/6223/6743/6417/5732/5729/5296/6284/7719/7640/6405/1718/3286/1343/5006/2328     | 0,517651573/0,51315914/0,454908643/0,434104894/0,413301146/0,461843226/0,371693648/0,144759507/0,146018285/0,166788128/0,184411024/0,164270571/0,185669803/0,179375911/0,185669803/0,173082019/1,31/0,461,06/0,49/1,17/0,71              | 19706,30541/18015,8537/14791,98098/17159,44716/20234,64026/20662,85583/21054,97377/42988,54096/46179,14791/38473,96147/31082,74043/34875,38859/28523,75522/35032,5747/41573,8041/44140,92249/4889,312977/3734,782609/3100/2740,816327/4278,632479/3278,873239                   | 23,86 +/- 1.36                |
| KI (+/-) (n=23)                                                                                  | 8078/2243/7390/8614/7694/6986/7454/7123/7879/2099/5653/5664/6770/4527/4260/6982/6833/4264/3903/2890/2952/8078/2243 | 0,421047583/0,122122026/0,431331061/0,545058222/0,411914229/0,511772224/0,470164726/0,420235728/0,542284389/0,053498079/0,159235458/0,137206837/0,171193852/0,162382404/0,125877832/1,52/1,22/1,51/1,41/0,9/1,03/0,421047583/0,122122026 | 19185,48006/18366,8751/17133,01142/15803,81627/18678,64584/13650,60407/15854,01794/16950,01048/14529,27682/39235,05387/35500,88704/41280,74167/39545,81269/27878,63647/33842,33684/4593,421053/5600,819672/2823,84106/2768,085106/3211,11111/2866,019417/19185,48006/18366,8751 | 23,65 +/- 1.30                |
| KI (-/-) (n=13)                                                                                  | 4881/6754/7264/7327/5792/6574/6119/5570/3338/2740/632/2864/4881                                                    | 0,521297007/0,39370683/0,511772224/0,539510556/0,17245263/0,168676295/0,156088512/0,145388896/0,62/0,94/0,34/1,26/0,521297007                                                                                                            | 9363,184395/17154,89669/14193,81448/13580,82789/3586,03458/38974,0597/39202,1163/38311,04124/5383,870968/2914,893617/1858,823529/2273,015873/9363,184395                                                                                                                        | 23,38 +/- 1.56                |

**Supplementary Table 6. HPLC measurements**

| Test | Age (days) | Sex (F/M)* | Measurement                         | Genotype Animals (n)                     | Information                                          | Mean    | s.e.m.                      | Statistical test           | Correction and/or post hoc test | P-value                    | Figure |                       |                       |     |
|------|------------|------------|-------------------------------------|------------------------------------------|------------------------------------------------------|---------|-----------------------------|----------------------------|---------------------------------|----------------------------|--------|-----------------------|-----------------------|-----|
| HPLC | 51-108     | (9/9)      | Dopamine, DA (pmoles/mg wet tissue) | WT = 18                                  | Frontal cortex, Frontal CTX                          | 1.06    | 0.15                        | Unpaired two-tailed t-test | -                               | Genotype: $P = 0.384$      | S6a    |                       |                       |     |
|      |            | (8/9)      |                                     | KI = 17                                  |                                                      | 1.27    | 0.19                        |                            |                                 |                            |        |                       |                       |     |
|      |            | (9/9)      |                                     | WT = 18                                  | Occipital cortex, Occipital CTX                      | 0.98    | 0.26                        | Unpaired two-tailed t-test | -                               | Genotype: $P = 0.578$      |        |                       |                       |     |
|      |            | (8/9)      |                                     | KI = 17                                  |                                                      | 0.80    | 0.19                        |                            |                                 |                            |        |                       |                       |     |
|      |            | (9/9)      |                                     | WT = 18                                  | Striatum, STR                                        | 59.51   | 8.29                        | Unpaired two-tailed t-test | -                               | Genotype: $P = 0.454$      |        |                       |                       |     |
|      |            | (8/9)      |                                     | KI = 17                                  |                                                      | 67.63   | 6.65                        |                            |                                 |                            |        |                       |                       |     |
|      |            | (7/9)      |                                     | WT = 16                                  | Hippocampus, HC                                      | 0.46    | 0.14                        | Unpaired two-tailed t-test | Welch's correction              | Genotype: $P = 0.437$      |        |                       |                       |     |
|      |            | (8/8)      |                                     | KI = 16                                  |                                                      | 0.69    | 0.26                        |                            |                                 |                            |        |                       |                       |     |
|      |            | (4/2)      |                                     | WT = 6                                   | Cerebellum, CRBL                                     | 0.10    | 0.02                        | Unpaired two-tailed t-test | -                               | Genotype: $P = 0.860$      |        |                       |                       |     |
|      |            | (3/2)      |                                     | KI = 5                                   |                                                      | 0.10    | 0.02                        |                            |                                 |                            |        |                       |                       |     |
|      |            | (9/9)      |                                     | WT = 18                                  | Brain stem, BS                                       | 0.62    | 0.04                        | Unpaired two-tailed t-test | -                               | Genotype: $P = 0.084$      |        |                       |                       |     |
|      |            | (8/9)      |                                     | KI = 17                                  |                                                      | 0.70    | 0.03                        |                            |                                 |                            |        |                       |                       |     |
|      |            | 51-108     |                                     | (9/9)                                    | Serotonin, 5-HT (pmoles/mg wet tissue)               | WT = 18 | Frontal cortex, Frontal CTX | 2.41                       | 0.15                            | Unpaired two-tailed t-test |        | -                     | Genotype: $P = 0.780$ | S6b |
|      |            |            |                                     | (8/9)                                    |                                                      | KI = 17 |                             | 2.35                       | 0.18                            |                            |        |                       |                       |     |
|      | (9/9)      |            | WT = 18                             | Occipital cortex, Occipital CTX          |                                                      | 2.03    | 0.14                        | Unpaired two-tailed t-test | -                               | Genotype: $P = 0.721$      |        |                       |                       |     |
|      | (8/9)      |            | KI = 17                             |                                          |                                                      | 1.97    | 0.09                        |                            |                                 |                            |        |                       |                       |     |
|      | (9/9)      |            | WT = 18                             | Striatum, STR                            |                                                      | 2.44    | 0.09                        | Unpaired two-tailed t-test | Welch's correction              | Genotype: $P = 0.281$      |        |                       |                       |     |
|      | (8/9)      |            | KI = 17                             |                                          |                                                      | 2.70    | 0.22                        |                            |                                 |                            |        |                       |                       |     |
|      | (9/9)      |            | WT = 18                             | Hippocampus, HC                          |                                                      | 3.25    | 0.22                        | Unpaired two-tailed t-test | -                               | Genotype: $P = 0.482$      |        |                       |                       |     |
|      | (8/9)      |            | KI = 17                             |                                          |                                                      | 3.06    | 0.15                        |                            |                                 |                            |        |                       |                       |     |
|      | (9/8)      |            | WT = 17                             | Cerebellum, CRBL                         |                                                      | 0.83    | 0.10                        | Unpaired two-tailed t-test | Welch's correction              | Genotype: $P = 0.764$      |        |                       |                       |     |
|      | (8/8)      |            | KI = 16                             |                                          |                                                      | 0.79    | 0.05                        |                            |                                 |                            |        |                       |                       |     |
|      | (9/9)      |            | WT = 18                             | Brain stem, BS                           |                                                      | 4.22    | 0.31                        | Unpaired two-tailed t-test | -                               | Genotype: $P = 0.233$      |        |                       |                       |     |
|      | (8/9)      |            | KI = 17                             |                                          |                                                      | 4.71    | 0.25                        |                            |                                 |                            |        |                       |                       |     |
|      | 51-108     |            | (9/9)                               | Noradrenaline, NA (pmoles/mg wet tissue) |                                                      | WT = 18 | Frontal cortex, Frontal CTX | 2.38                       | 0.14                            | Unpaired two-tailed t-test | -      | Genotype: $P = 0.410$ | S6c                   |     |
|      |            |            | (8/9)                               |                                          |                                                      | KI = 17 |                             | 2.20                       | 0.16                            |                            |        |                       |                       |     |
|      |            | (9/9)      | WT = 18                             |                                          | Occipital cortex, Occipital CTX                      | 1.74    | 0.11                        | Unpaired two-tailed t-test | -                               | Genotype: $P = 0.931$      |        |                       |                       |     |
|      |            | (8/9)      | KI = 17                             |                                          |                                                      | 1.72    | 0.13                        |                            |                                 |                            |        |                       |                       |     |
|      |            | (9/9)      | WT = 18                             |                                          | Striatum, STR                                        | 1.12    | 0.11                        | Unpaired two-tailed t-test | -                               | Genotype: $P = 0.545$      |        |                       |                       |     |
|      |            | (8/9)      | KI = 17                             |                                          |                                                      | 1.02    | 0.11                        |                            |                                 |                            |        |                       |                       |     |
|      |            | (9/9)      | WT = 18                             |                                          | Hippocampus, HC                                      | 2.21    | 0.07                        | Unpaired two-tailed t-test | Welch's correction              | Genotype: $P = 0.277$      |        |                       |                       |     |
|      |            | (8/9)      | KI = 17                             |                                          |                                                      | 2.40    | 0.16                        |                            |                                 |                            |        |                       |                       |     |
|      |            | (9/9)      | WT = 18                             |                                          | Cerebellum, CRBL                                     | 2.39    | 0.12                        | Unpaired two-tailed t-test | -                               | Genotype: $P = 0.447$      |        |                       |                       |     |
|      |            | (8/9)      | KI = 17                             |                                          |                                                      | 2.52    | 0.13                        |                            |                                 |                            |        |                       |                       |     |
|      |            | (9/9)      | WT = 18                             |                                          | Brain stem, BS                                       | 4.11    | 0.15                        | Unpaired two-tailed t-test | -                               | Genotype: $P = 0.713$      |        |                       |                       |     |
|      |            | (8/9)      | KI = 17                             |                                          |                                                      | 4.20    | 0.21                        |                            |                                 |                            |        |                       |                       |     |
|      |            | 51-108     | (9/9)                               |                                          | Gamma-aminobutyric acid, GABA (nmoles/mg wet tissue) | WT = 18 | Frontal cortex, Frontal CTX | 2.65                       | 0.17                            | Unpaired two-tailed t-test | -      | Genotype: $P = 0.841$ |                       | S6d |
|      |            |            | (8/9)                               |                                          |                                                      | KI = 17 |                             | 2.70                       | 0.18                            |                            |        |                       |                       |     |
|      | (9/9)      |            | WT = 18                             | Occipital cortex, Occipital CTX          |                                                      | 2.39    | 0.13                        | Unpaired two-tailed t-test | Welch's correction              | Genotype: $P = 0.174$      |        |                       |                       |     |
|      | (8/9)      |            | KI = 17                             |                                          |                                                      | 2.81    | 0.27                        |                            |                                 |                            |        |                       |                       |     |
|      | (9/9)      |            | WT = 18                             | Striatum, STR                            |                                                      | 3.24    | 0.16                        | Unpaired two-tailed t-test | Welch's correction              | Genotype: $P = 0.296$      |        |                       |                       |     |
|      | (8/9)      |            | KI = 17                             |                                          |                                                      | 3.81    | 0.51                        |                            |                                 |                            |        |                       |                       |     |
|      | (9/9)      |            | WT = 18                             | Hippocampus, HC                          |                                                      | 4.55    | 0.26                        | Unpaired two-tailed t-test | -                               | Genotype: $P = 0.862$      |        |                       |                       |     |
|      | (8/9)      |            | KI = 17                             |                                          |                                                      | 4.49    | 0.23                        |                            |                                 |                            |        |                       |                       |     |
|      | (9/9)      |            | WT = 18                             | Cerebellum, CRBL                         |                                                      | 2.61    | 0.17                        | Unpaired two-tailed t-test | -                               | Genotype: $P = 0.756$      |        |                       |                       |     |
|      | (8/9)      |            | KI = 17                             |                                          |                                                      | 2.69    | 0.19                        |                            |                                 |                            |        |                       |                       |     |
|      | (8/9)      |            | WT = 17                             | Brain stem, BS                           |                                                      | 5.47    | 0.59                        | Unpaired two-tailed t-test | -                               | Genotype: $P = 0.694$      |        |                       |                       |     |
|      | (8/9)      |            | KI = 17                             |                                          |                                                      | 5.84    | 0.73                        |                            |                                 |                            |        |                       |                       |     |

\*All male and female data sets were statistically comparable ( $P > 0.05$ ) and thus pooled. Test for pool of male and female data was carried out using one-way ANOVA with Tukey's post hoc comparison test (data sets with same variance (Bartlett's test) or Kruskal-Wallis with Dunn's post hoc comparison test (data sets with unequal variance (Bartlett's test); the latter is denoted with \*).



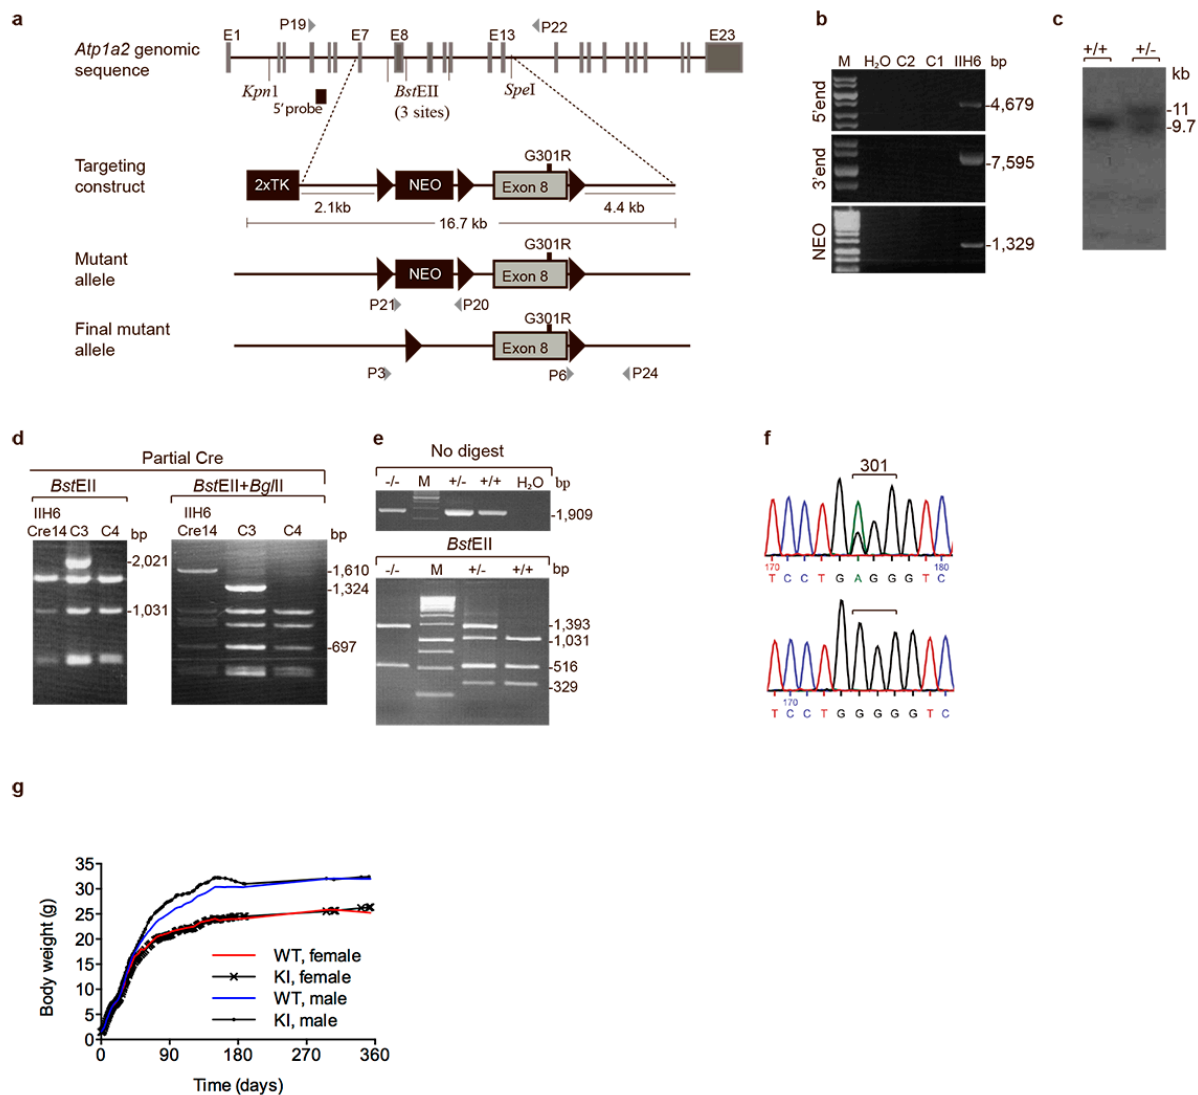

### Figure S1. Targeting Strategy Screenings and Basic Characterization of the $\alpha_2^{+/G301R}$ Knock-in Mice

(a) Diagram of the targeting strategy showing the oligonucleotide primers (grey triangles: P3, P6, P19-P22, and P24), the 5' Southern probe (black square), and the restriction enzyme sites used for screenings and genotyping. Introduction of a 3' LoxP site (dark triangle flanking Exon 8) abolished an endogenous *BstEII* site. Partial Cre-excision removed the NEO cassette and left a LoxP site in intron 7. (b) PCR screenings verified homologous recombination in the IIH6 clone, which was not observed for two negative controls (C1 and C2). (c) Southern blotting analysis verified heterozygous homologous recombination in clone IIH6 not observed for control (ES cells). (d) Partial Cre-excision of LoxP-NEO-LoxP cassette in the IIH6Cre14 clone was verified by PCR and not observed for two controls (C3 and C4). (e) Crossing of two  $\alpha_2^{+/G301R}$  mice gained homozygous (-/-), heterozygous (+/-) and WT (+/+) newborn pups identified by PCR-based genotyping. (f) Sequencing confirmed a heterozygous G→A base exchange in position 901 in the genomic DNA of a  $\alpha_2^{+/G301R}$  mouse which was not present in WT. (g) Body weights (g) of  $\alpha_2^{+/G301R}$  (females n=11 and males n=6) and WT (females n=7 and males n=7) mice at the indicated ages (days) were determined. Data shown as means, with s.e.m. omitted for clarity.

For additional informations, see Supplementary Table 1.

M; molecular DNA marker, bp; base pair, H<sub>2</sub>O; No template control where DNA was substituted with water.



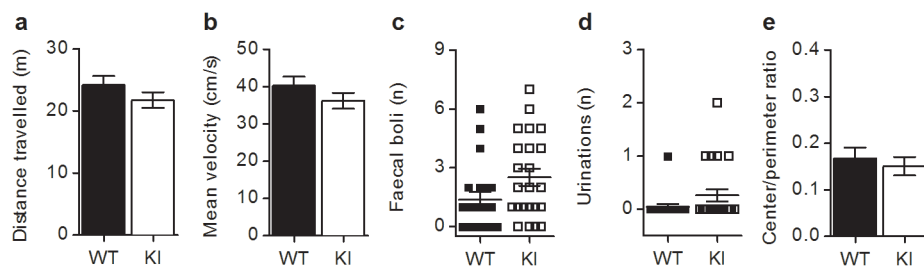

**Figure S3. Male  $\alpha_2^{+/G301R}$  Mice Behaved as WT in the Open Field Test**

(a,b) In the open field test, male  $\alpha_2^{+/G301R}$  (n=23) and WT (n=21) mice travelled the same distance (m) (a) and moved with the same mean velocity (cm/s) (b). (c,d) Furthermore, male  $\alpha_2^{+/G301R}$  and WT mice made the same amount of droppings (n) (c) and urinations (n) (d). (e) In addition, the center/perimeter ratios of male  $\alpha_2^{+/G301R}$  and WT mice were comparable.

Data shown as means  $\pm$  s.e.m.

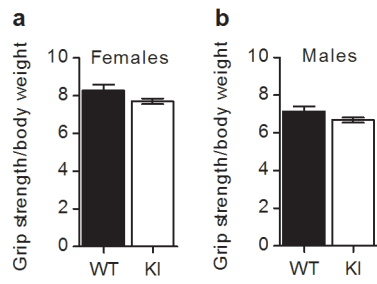

**Figure S4. Female and Male  $\alpha_2^{+/G301R}$  Mice Had Front Paw Grip Strength Comparable to WT**

Body weight (g) and front paw grip strength (g) were determined for each mouse.

(**a,b**) Front paw grip strength/body weight was the same for female (**a**) and male (**b**)  $\alpha_2^{+/G301R}$  (n=17 and n=23, respectively) and WT (n=13 and n= 22, respectively) mice.

Data shown as means  $\pm$  s.e.m.

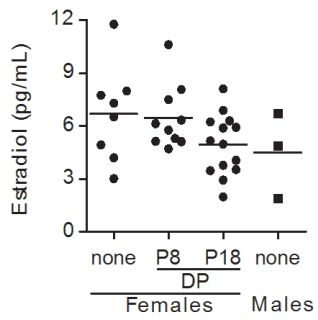

**Figure S5. Depoprovera Lowered and Stabilized the Level of Estradiol in Serum from Female WT Mice**

Female WT mice (n=24) received Depoprovera (DP)-treatment at the time = 0 days, and after eight (P8) (n=10) or 18 (P18) (n=14) days *post* injection they were decapitated and serum was obtained.

For reference, serum was obtained from untreated female (n=8) and male (n=3) WT mice, and all serum samples were analyzed for the level of estradiol (pg/mL).

Data shown as scatter plots.

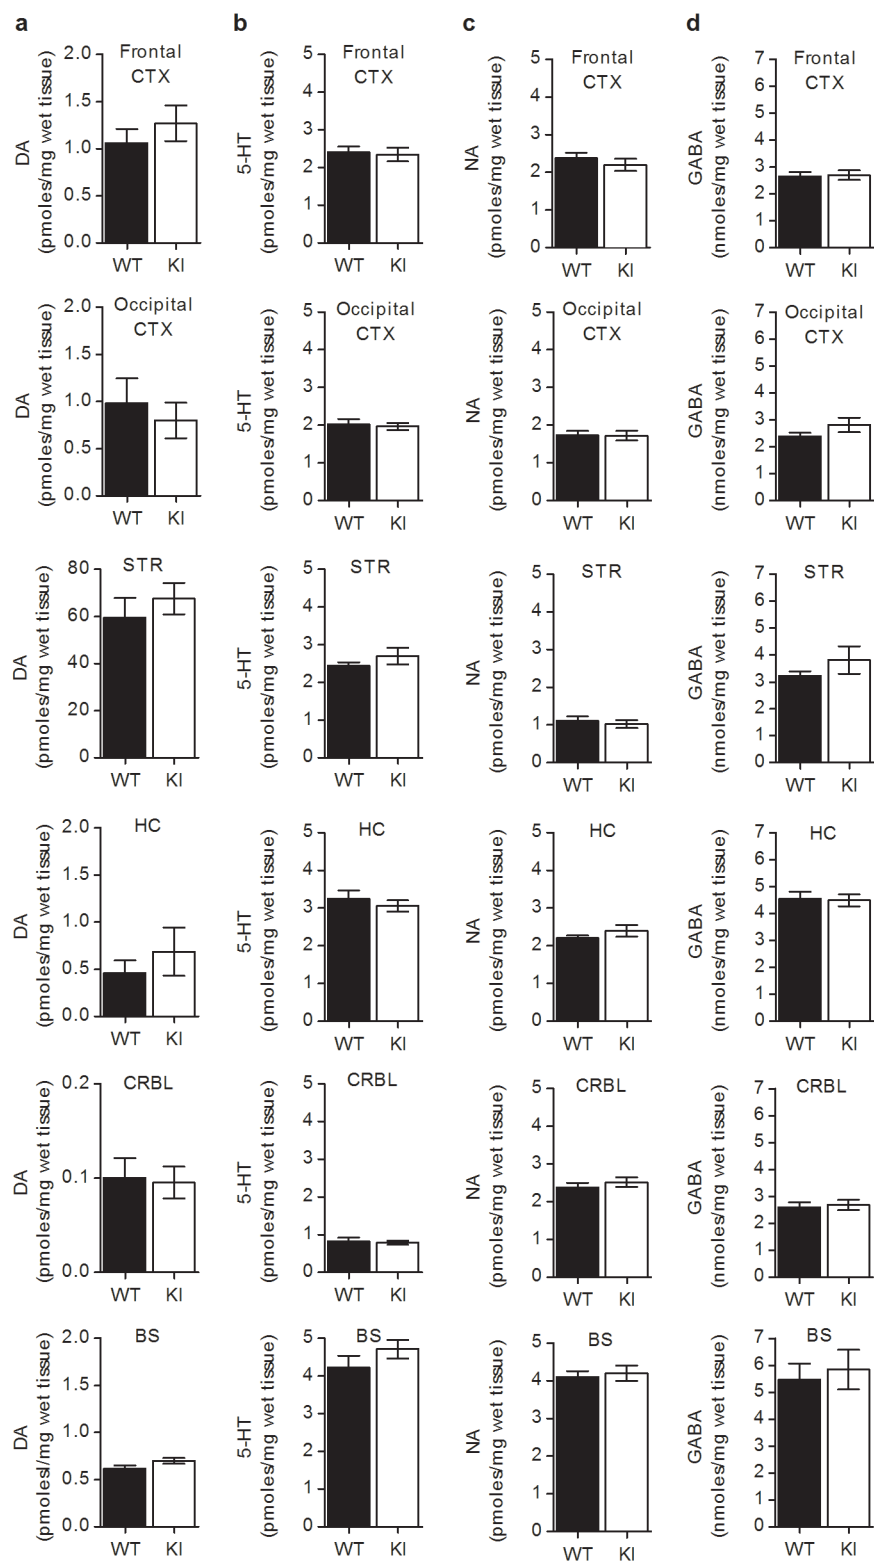

**Figure S6. Comparable Monoamine and GABA Levels Existed in Brain Lysates From  $\alpha_2^{+/G301R}$  and WT Mice**

**(a-d)** Brain lysates (frontal cortex (CTX), occipital CTX, striatum (STR), hippocampus (HC), cerebellum (CRBL) and brain stem (BS)) were HPLC-analyzed, and  $\alpha_2^{+/G301R}$  and WT mice showed comparable levels of dopamine (DA) in CTX (n= 17 and n= 18, respectively), STR (n= 17 and n= 18, respectively), HC (n= 16 and n= 16, respectively), CRBL (n= 5 and n= 6, respectively) and BS (n= 17 and n= 18, respectively) **(a)**, serotonin (5-hydroxytryptamine, 5-HT) in CTX (n= 17 and n= 18, respectively), STR (n= 17 and n= 18, respectively), HC (n= 17 and n= 18, respectively), CRBL (n= 16 and n= 17, respectively) and BS (n= 17 and n= 18, respectively) **(b)**, noradrenaline (NA) in CTX (n= 17 and n= 18, respectively), STR (n= 17 and n= 18, respectively), HC (n= 17 and n= 18, respectively), CRBL (n= 17 and n= 18, respectively) and BS (n= 17 and n= 18, respectively) **(c)** and gamma-aminobutyric acid (GABA) in CTX (n= 17 and n= 18, respectively), STR (n= 17 and n= 18, respectively), HC (n= 17 and n= 18, respectively), CRBL (n= 17 and n= 18, respectively) and BS (n= 17 and n= 17, respectively) **(d)**.

Monoamine levels were expressed as pmoles/mg wet tissue, GABA levels as nmoles/mg wet tissue.

Data shown as means  $\pm$  s.e.m.

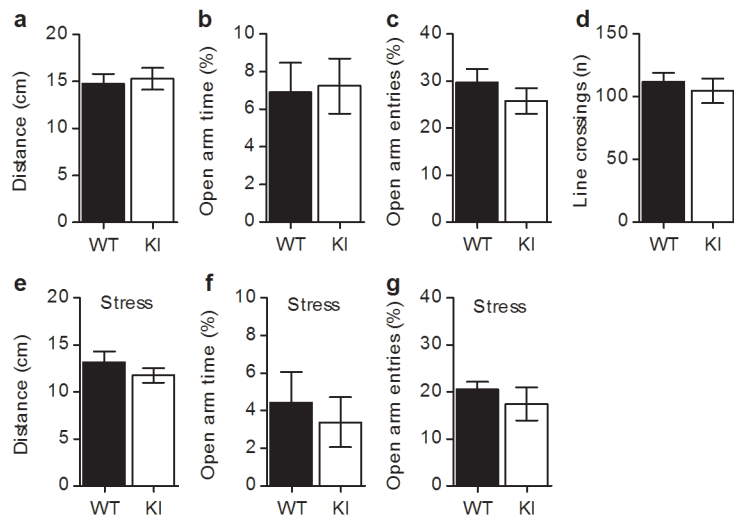

**Figure S7. The  $\alpha_2^{+/G301R}$  Mice Were Not Anxious in the Elevated Plus Maze Test**

(a-d) In the elevated plus maze (EPM),  $\alpha_2^{+/G301R}$  (n=10) and WT (n=10) mice travelled the same distance (cm) (a), spent the same relative amount of time (%) in the open arms (b), had the same relative amount of open arm entries (%) (c) and had the same number of line crossings (n) (d).

(e-g) Stress prior to the EPM experiment showed that  $\alpha_2^{+/G301R}$  (n=10) and WT (n=10) mice travelled the same distance (cm) (e), spent the same relative amount of time (%) in the open arms (f) and had the same amount of open arm entries (%) (g).

Data shown as means  $\pm$  s.e.m.
